# Supplementary material for: Variations in Flavonoid Metabolites Along Altitudinal Gradient in a Desert Medicinal Plant Agriophyllum squarrosum
Source: PubMed Central journal article supplement (PMC8329721; doi:10.3389/fpls.2021.683265), 2021-06-30
Supplement: Image_1.pdf [file Image_1.pdf]

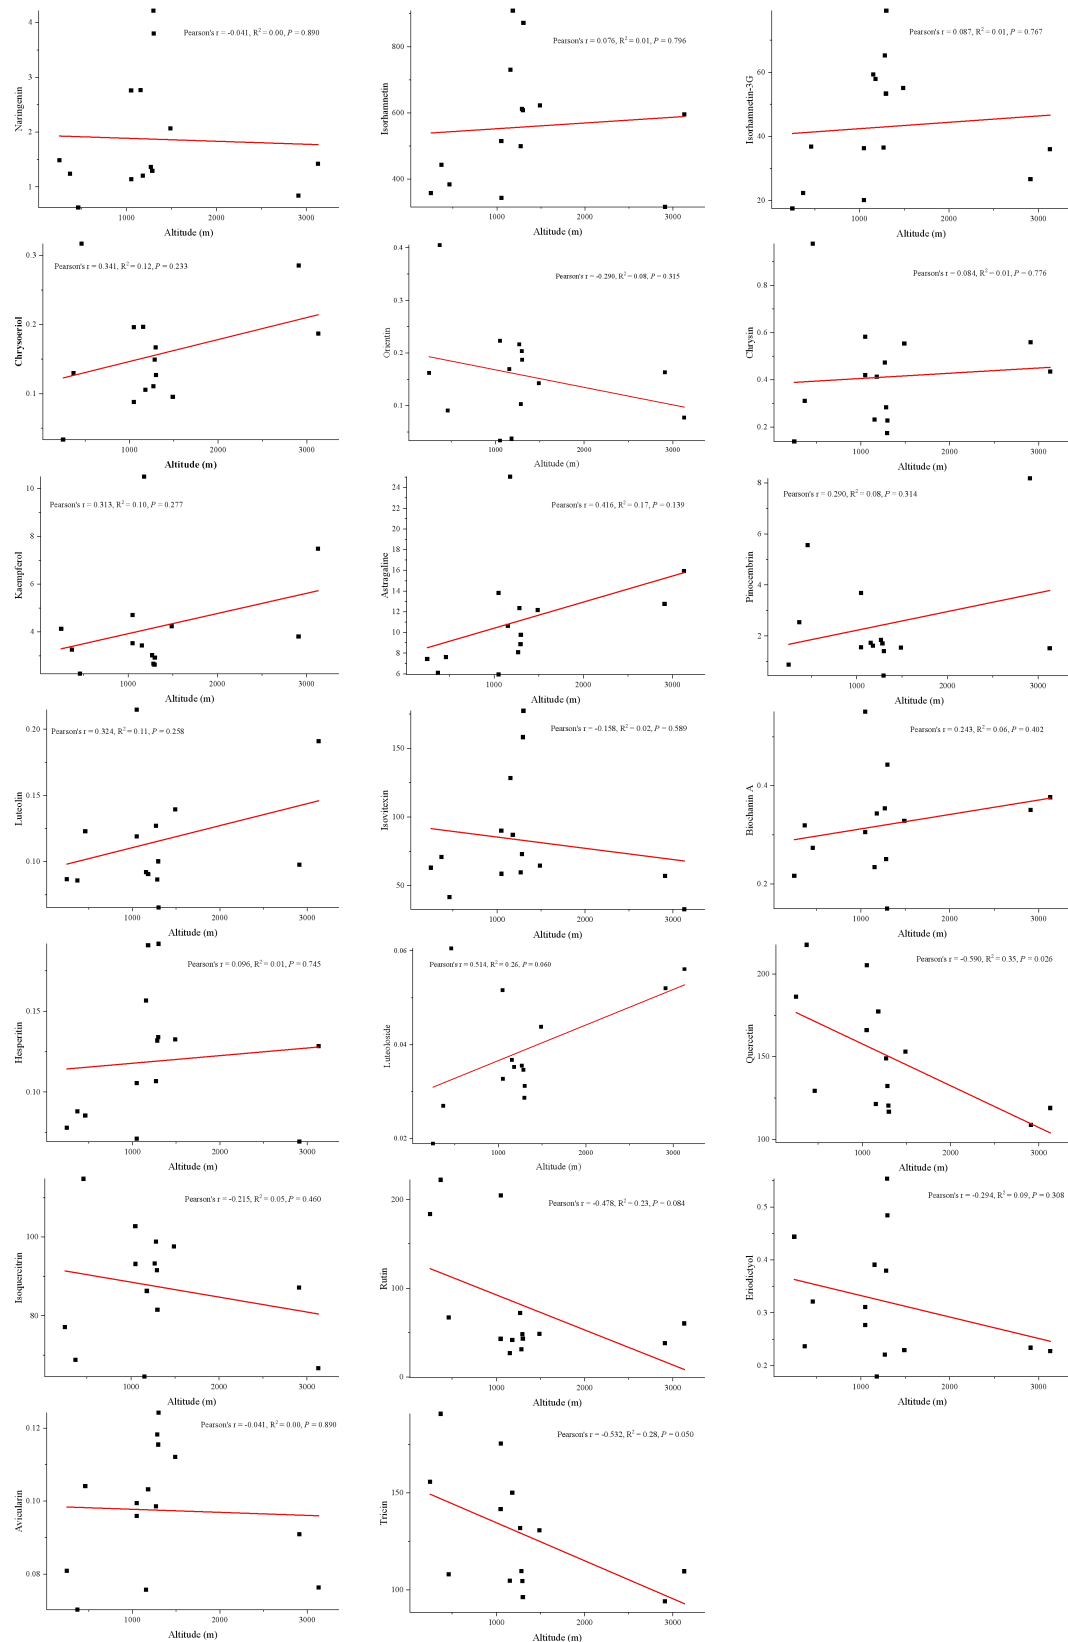

**Figure S1** Relationship between altitude and flavonoid metabolites. The linear regressions were considered significant when  $P < 0.05$ .

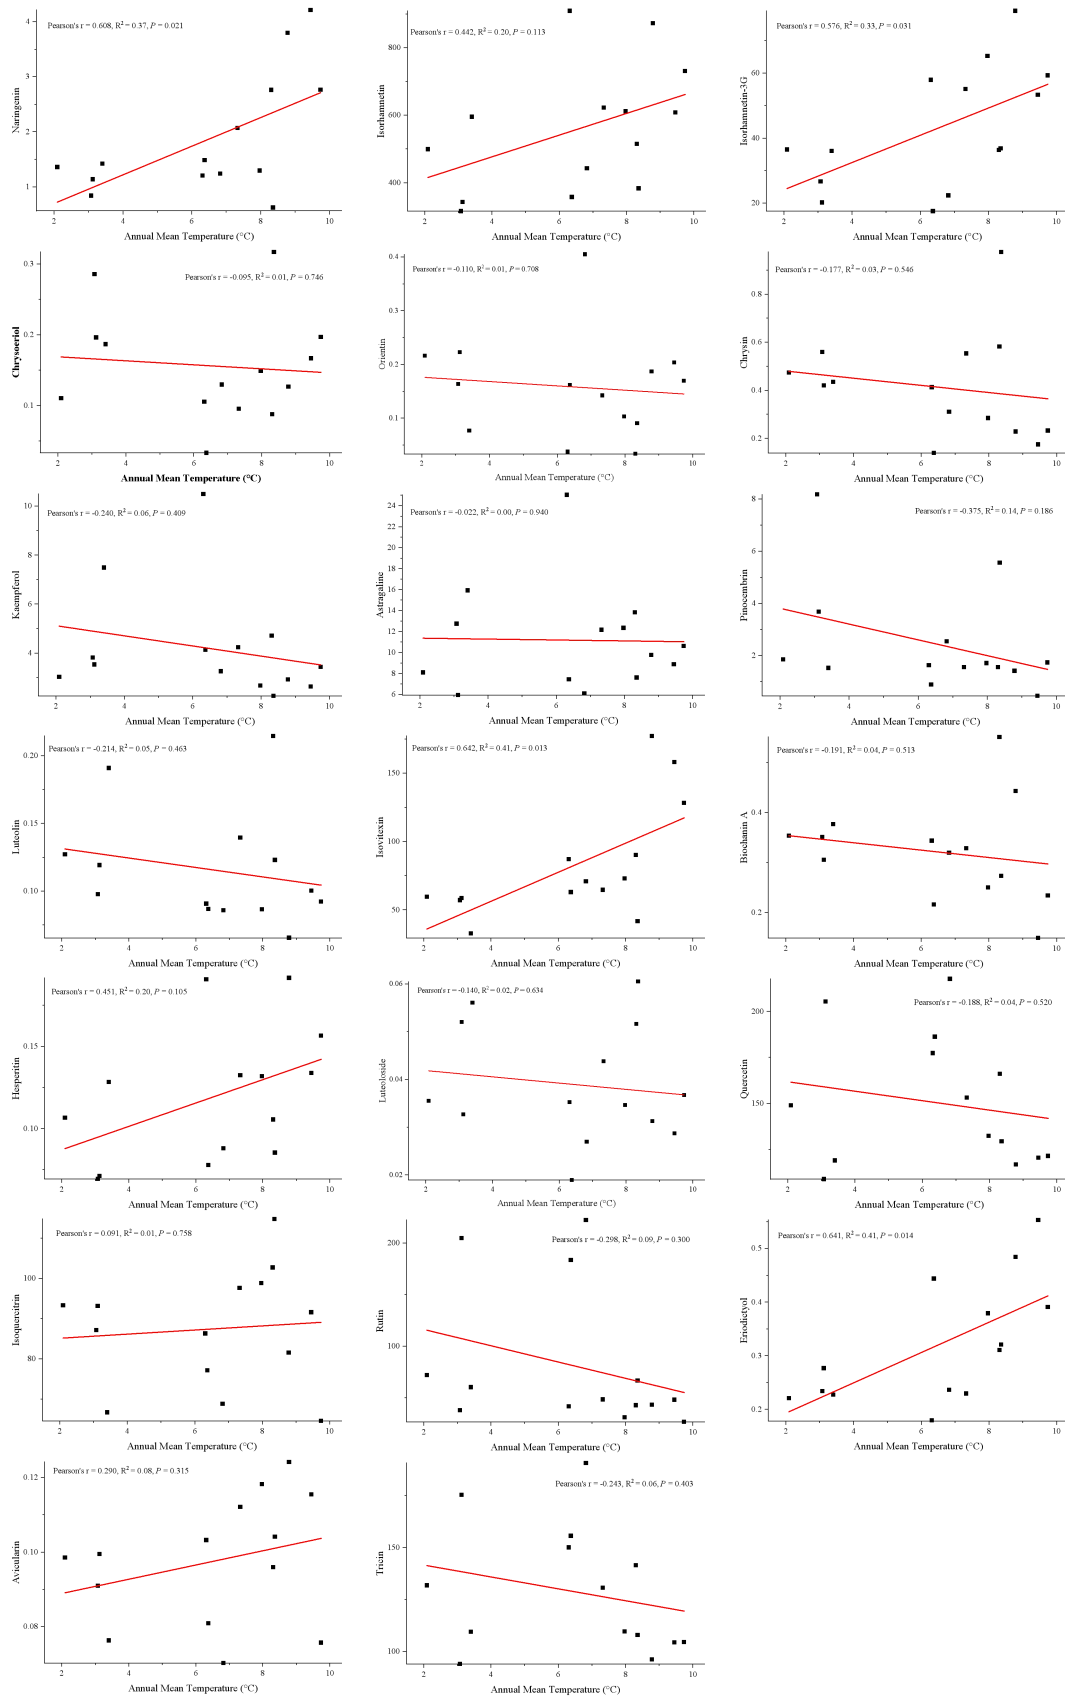

**Figure S2** Relationship between annual mean temperature and flavonoid metabolites.

The linear regressions were considered significant when  $P < 0.05$ .

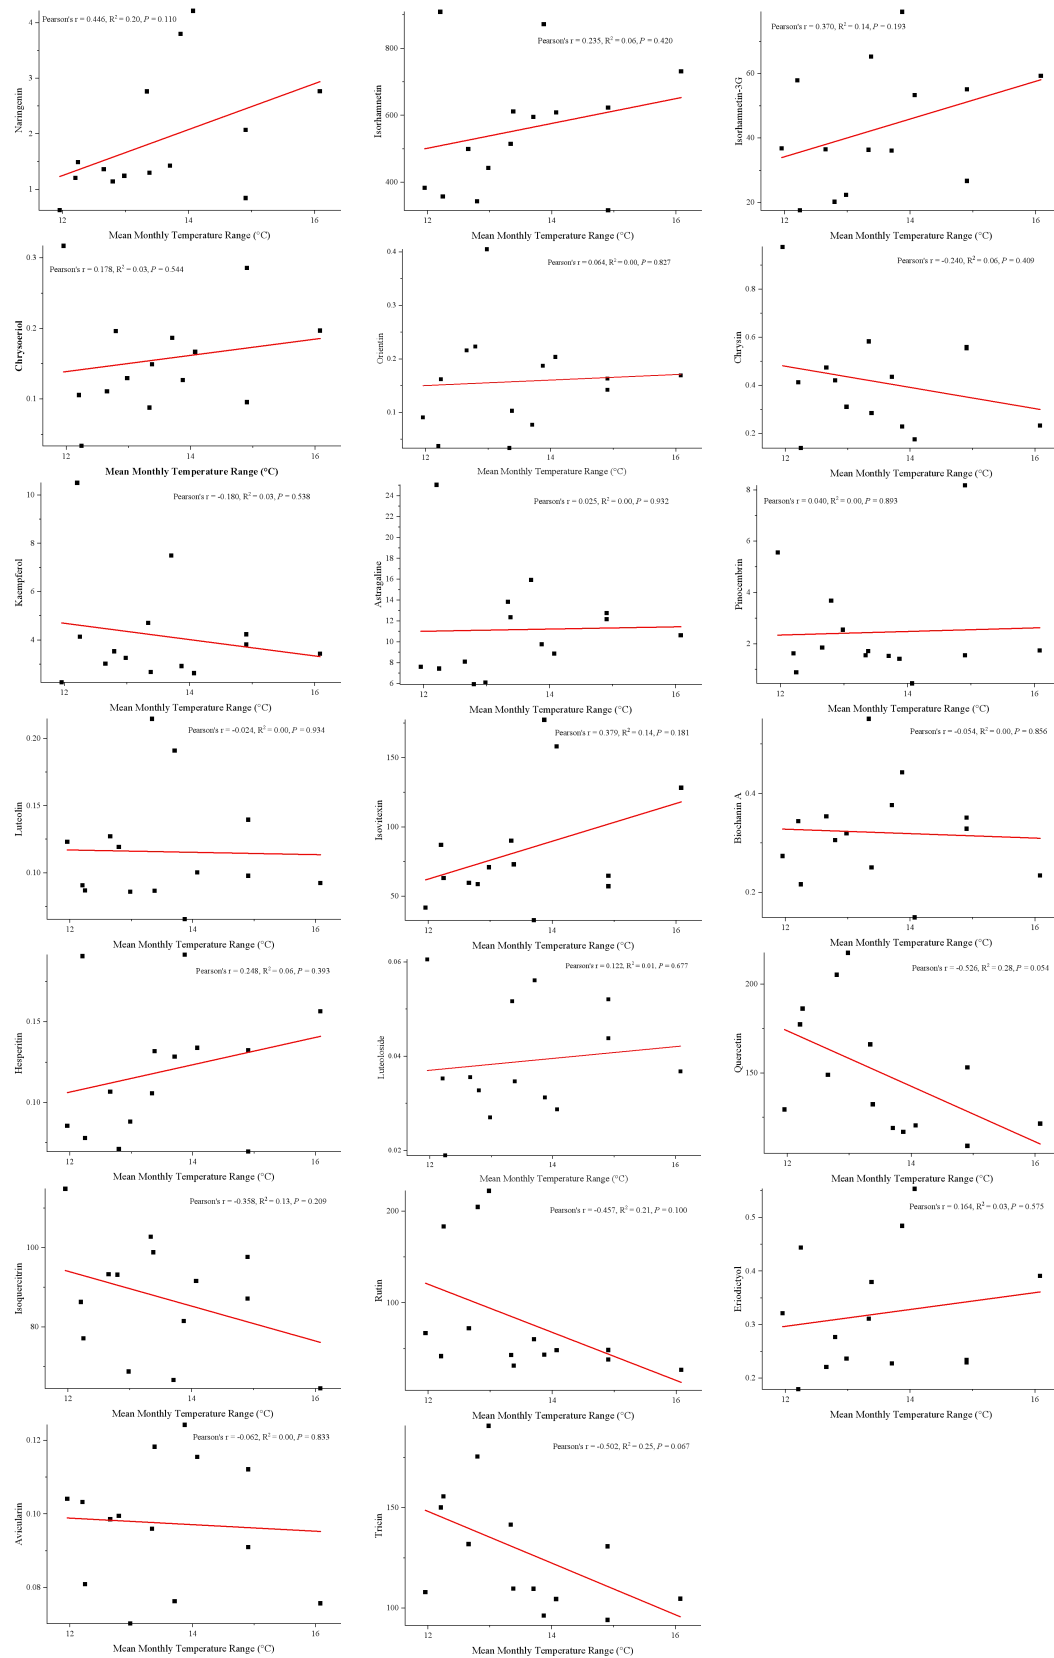

**Figure S3** Relationship between mean monthly temperature range temperature and flavonoid metabolites. The linear regressions were considered significant when  $P < 0.05$ .

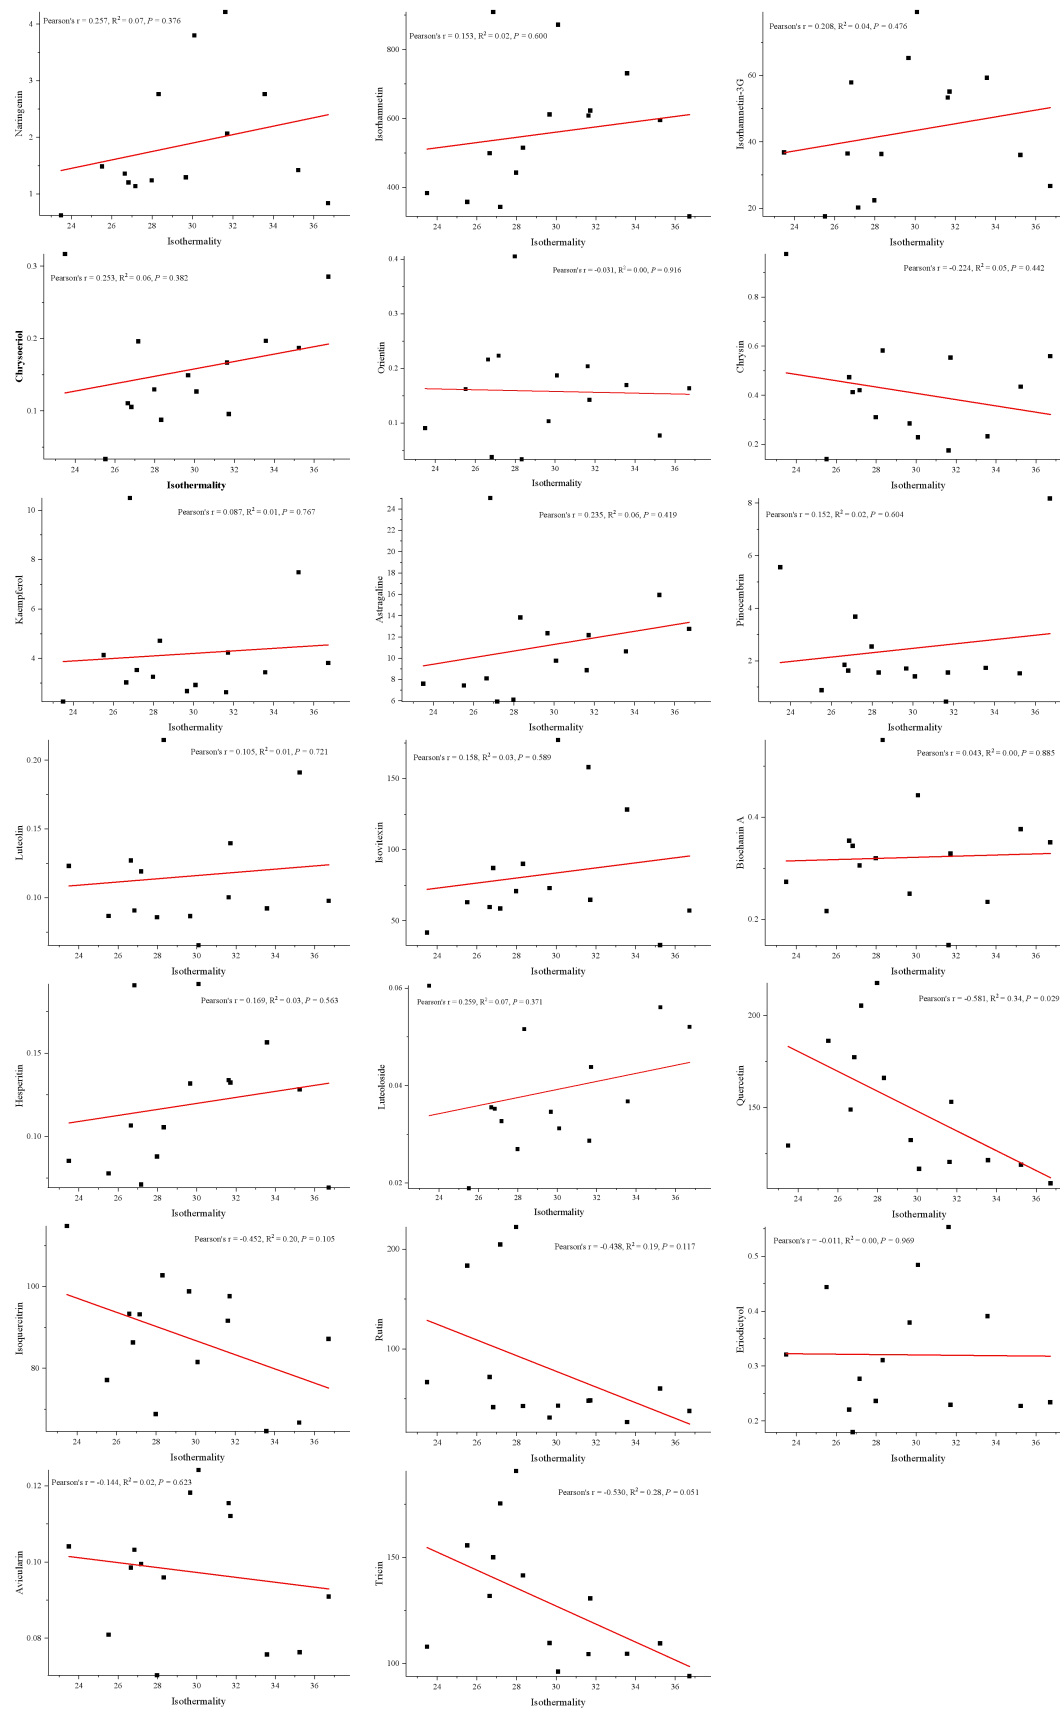

**Figure S4** Relationship between Isothermality and flavonoid metabolites. The linear regressions were considered significant when  $P < 0.05$ .

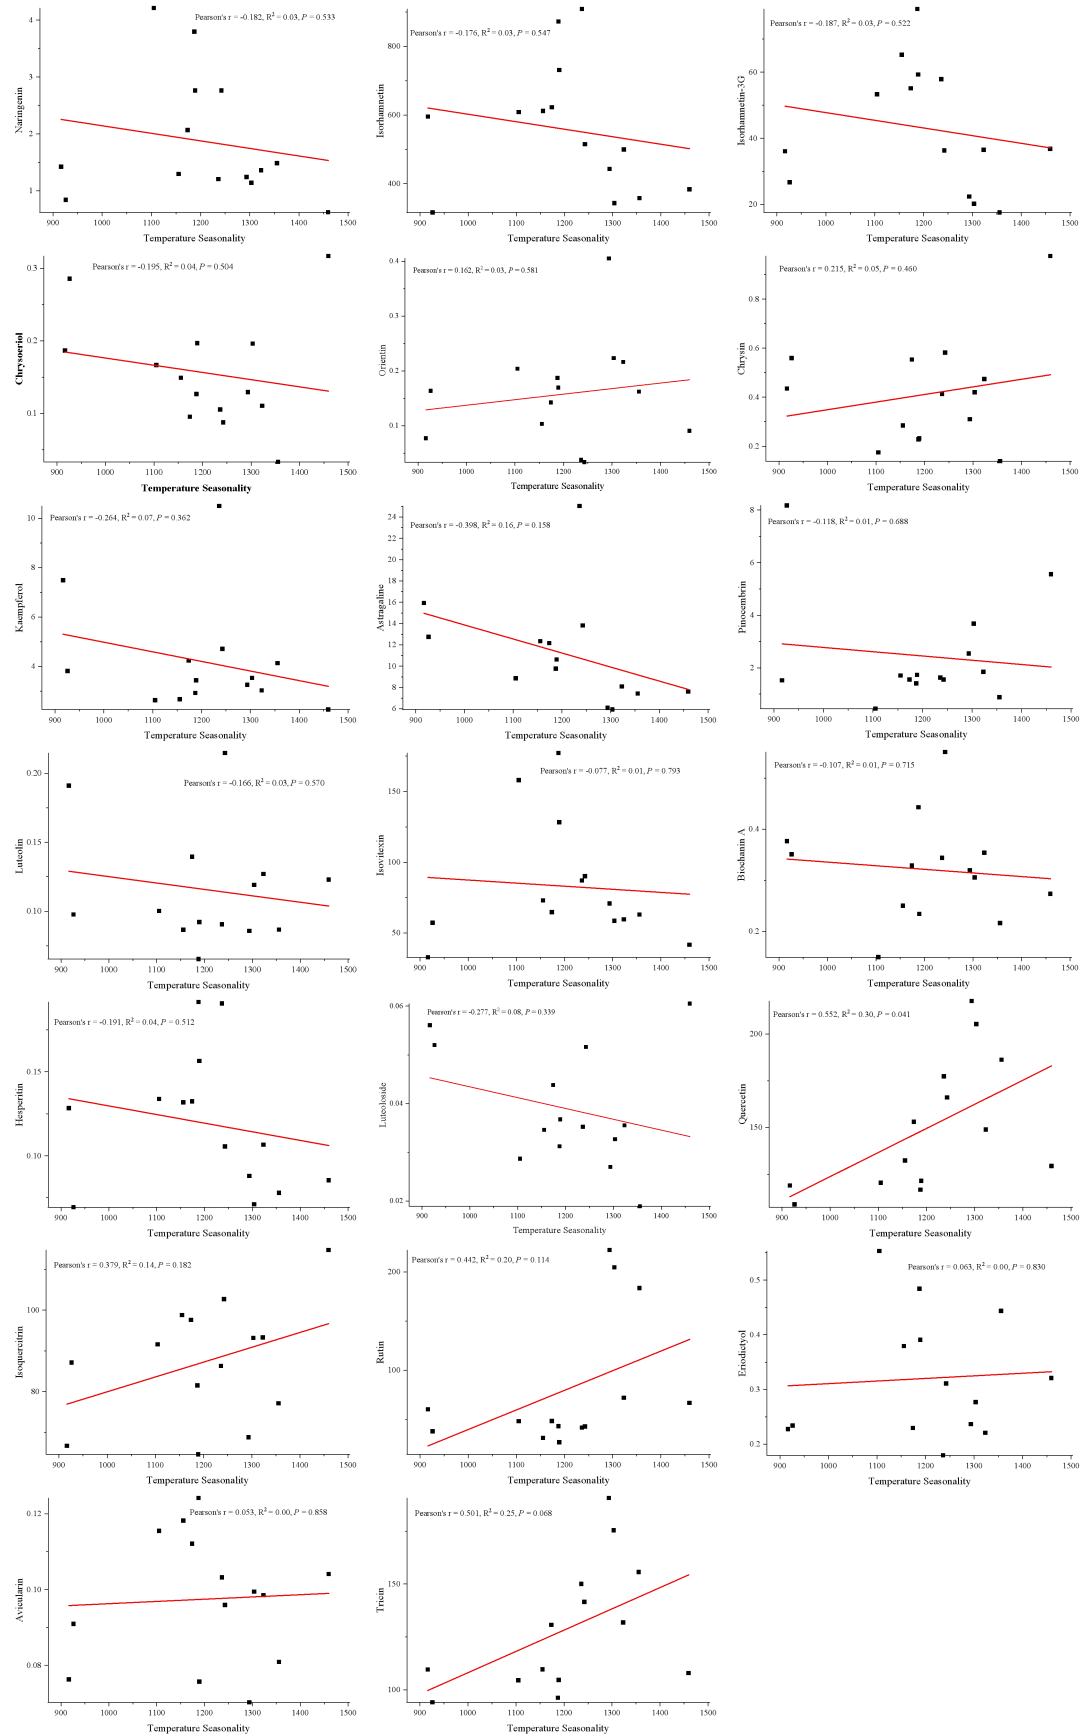

**Figure S5** Relationship between temperature seasonality and flavonoid metabolites.

The linear regressions were considered significant when  $P < 0.05$ .

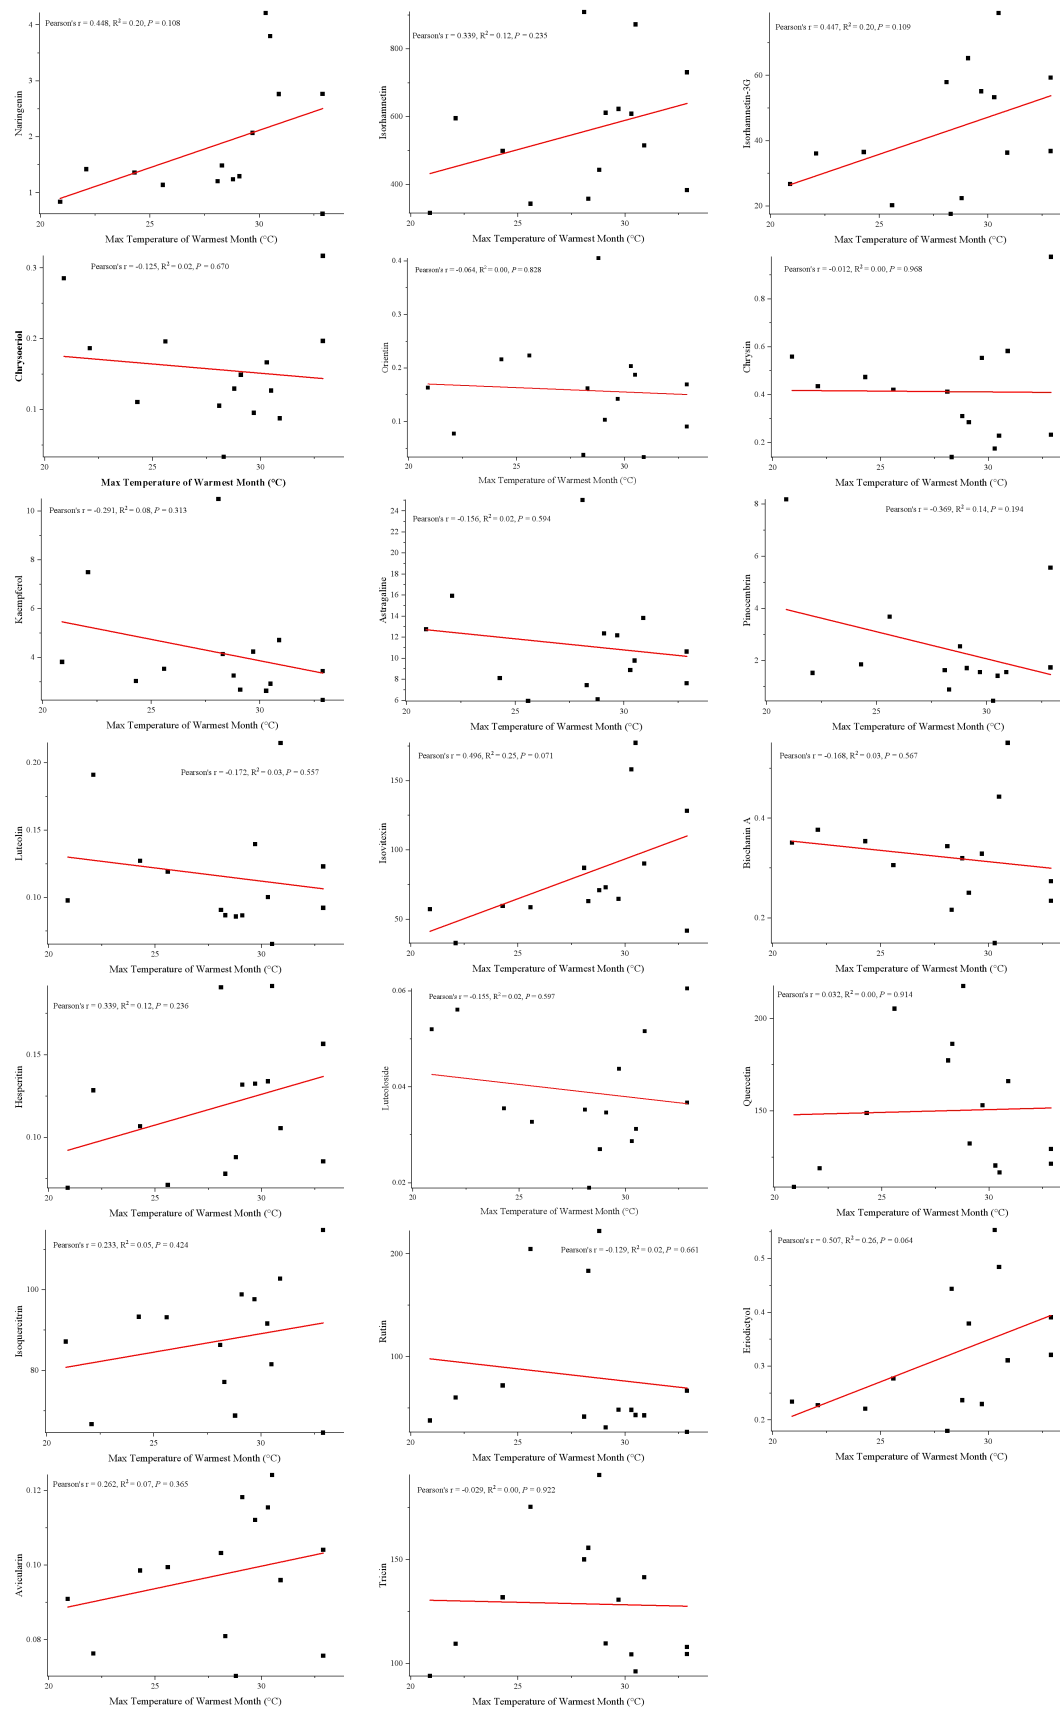

**Figure S6** Relationship between max temperature of warmest month and flavonoid metabolites. The linear regressions were considered significant when  $P < 0.05$ .

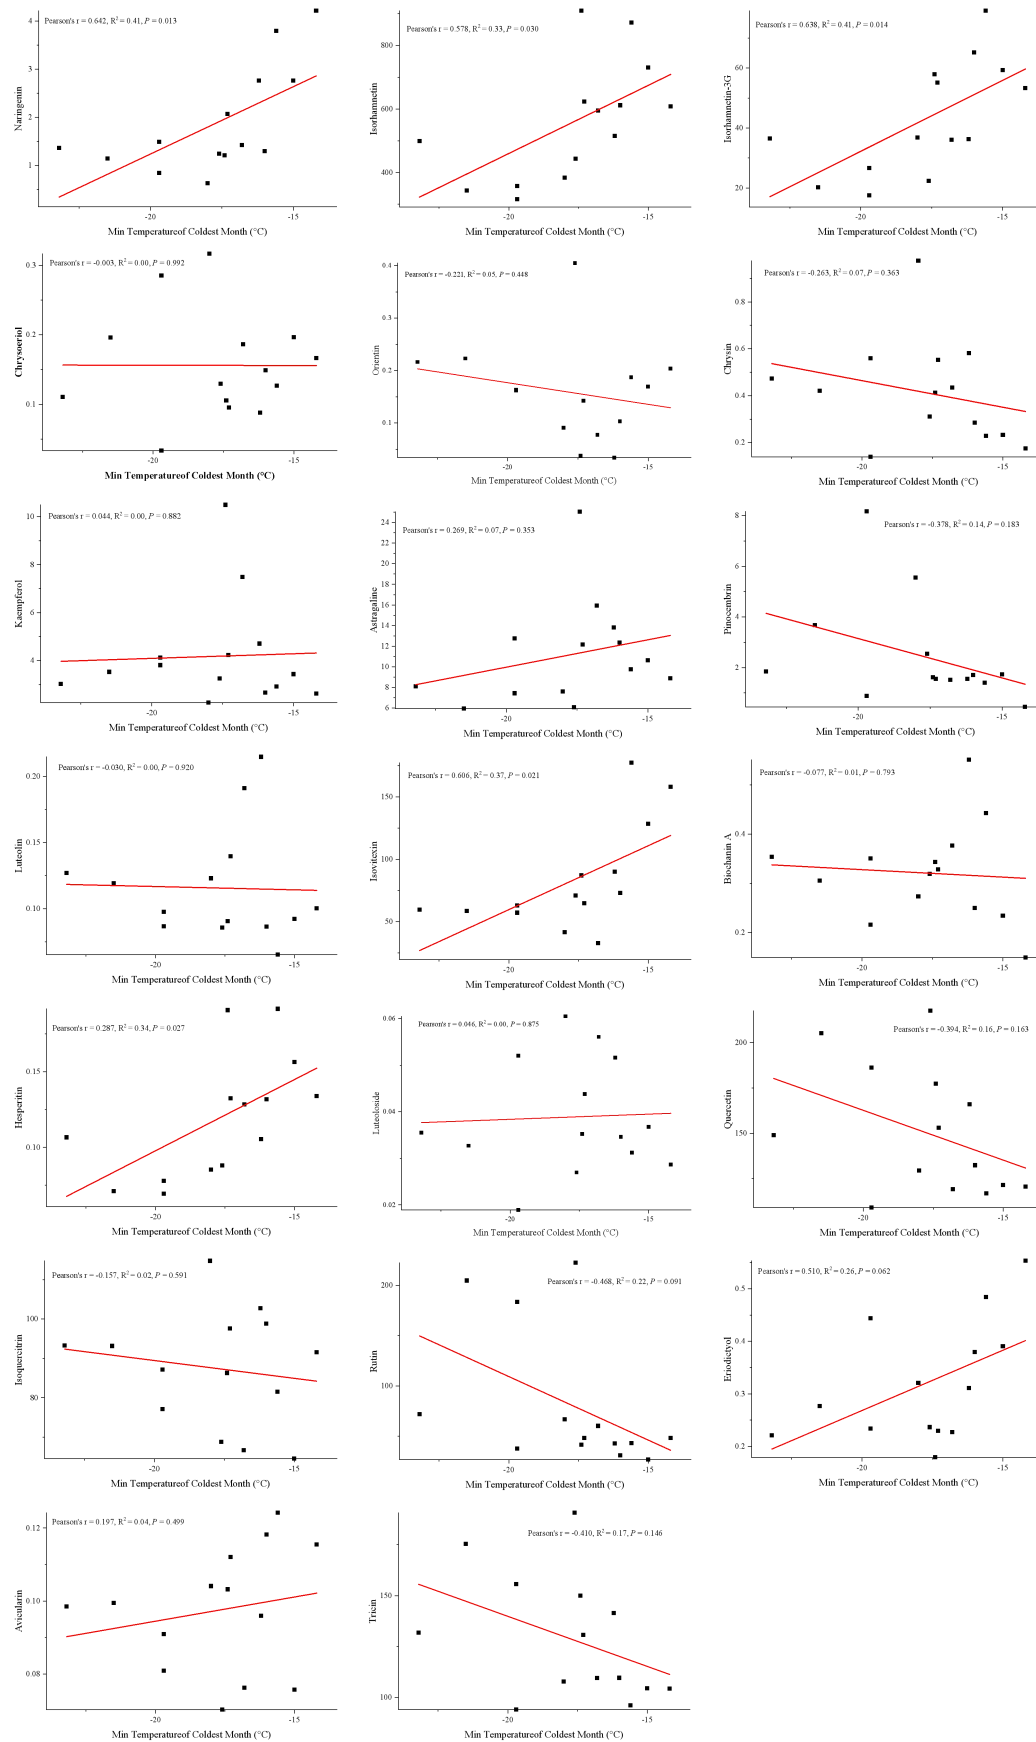

**Figure S7** Relationship between temperature of coldest month and flavonoid metabolites. The linear regressions were considered significant when  $P < 0.05$ .

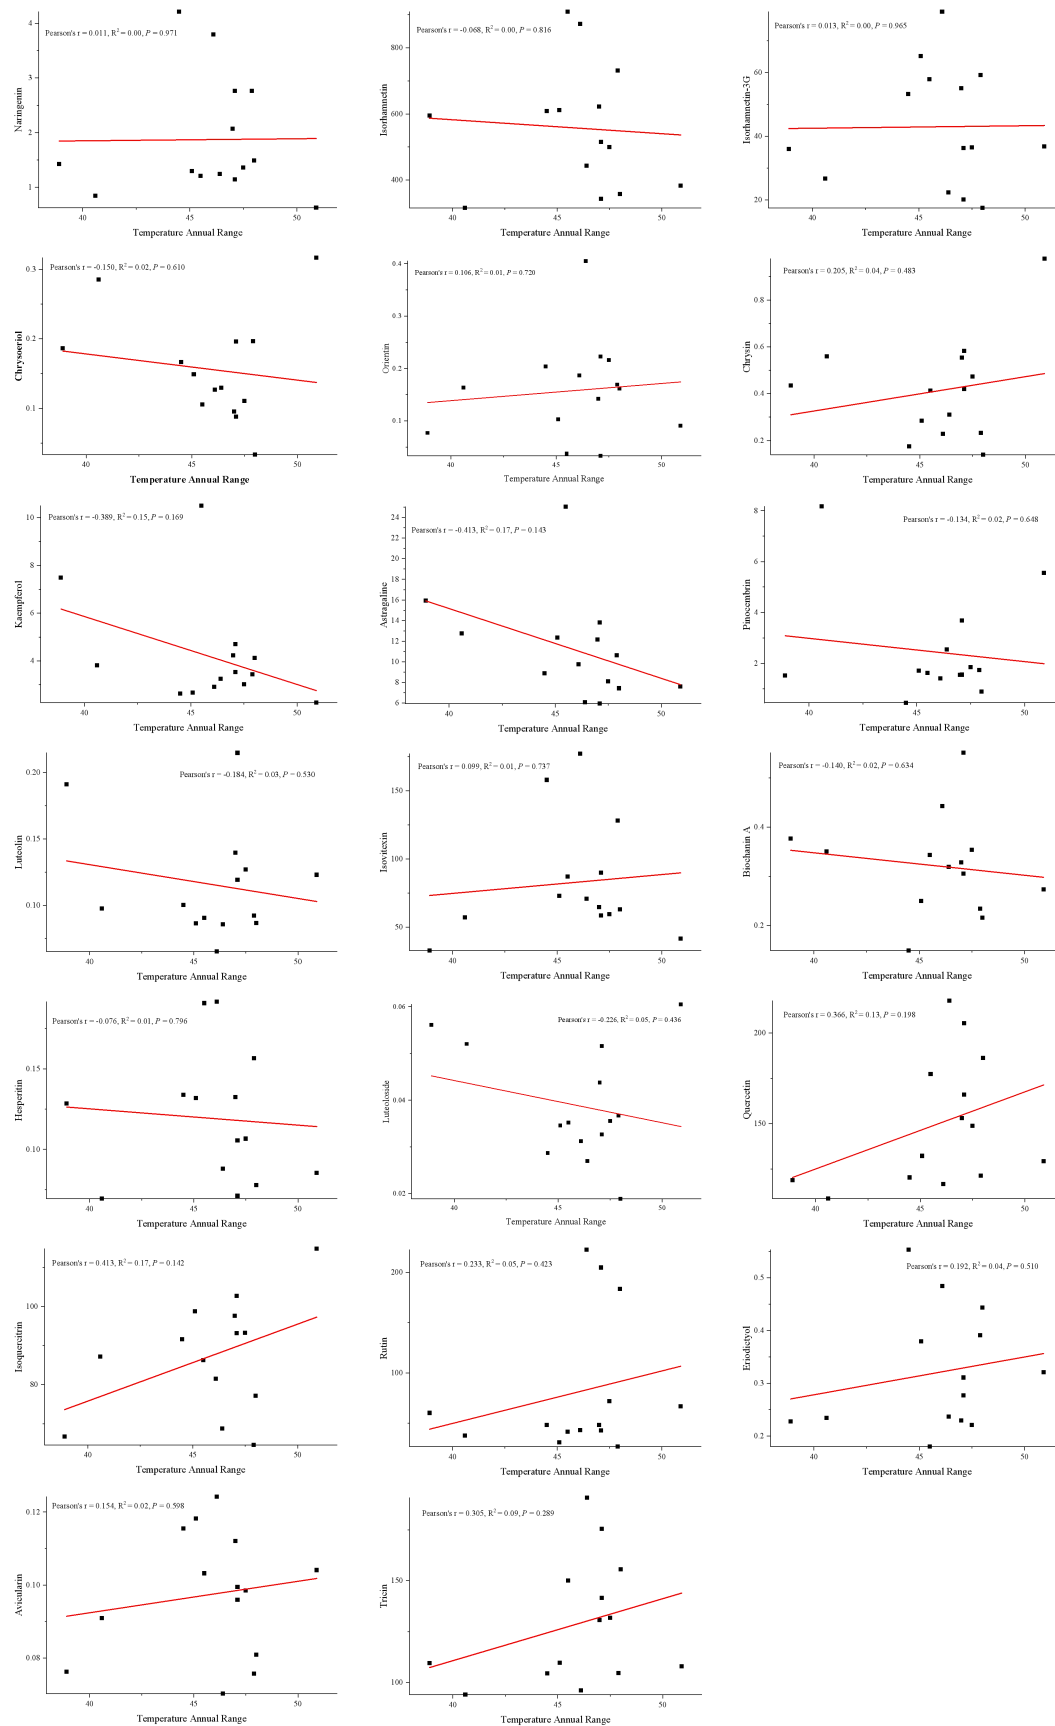

**Figure S8** Relationship between temperature annual range and flavonoid metabolites. The linear regressions were considered significant when  $P < 0.05$ .



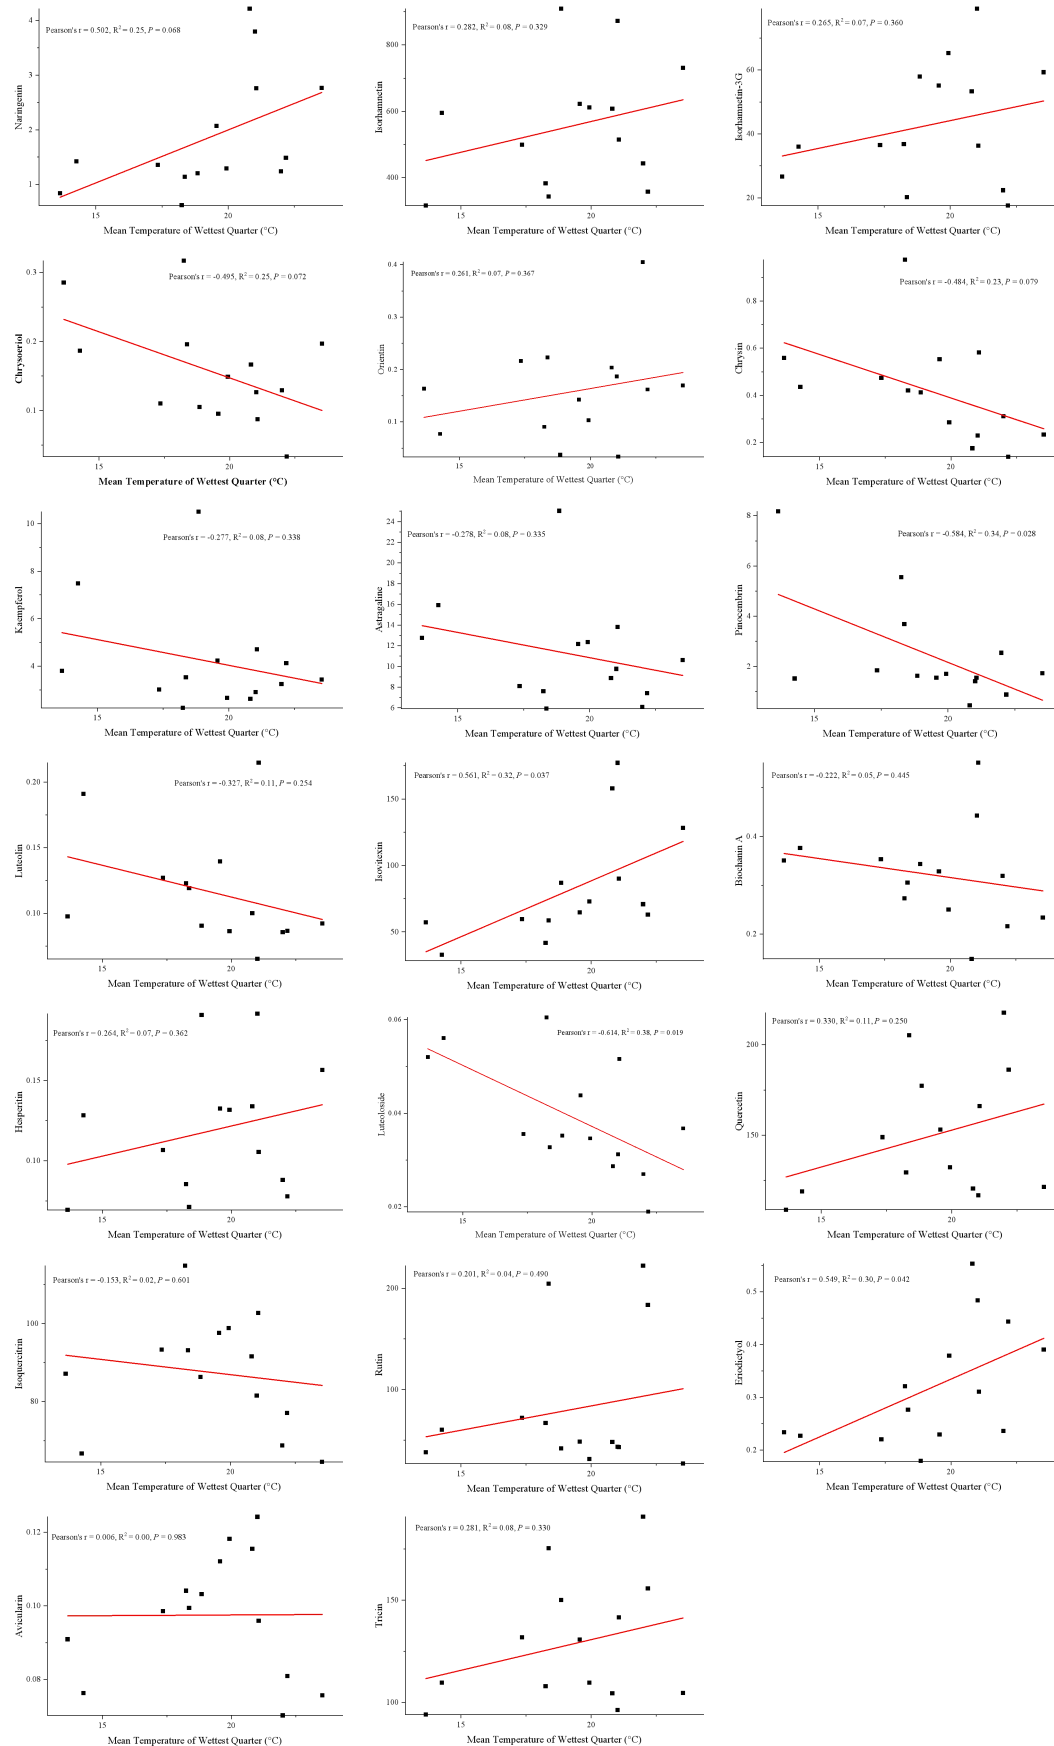

**Figure S9** Relationship between mean temperature of wettest quarter and flavonoid metabolites. The linear regressions were considered significant when  $P < 0.05$ .

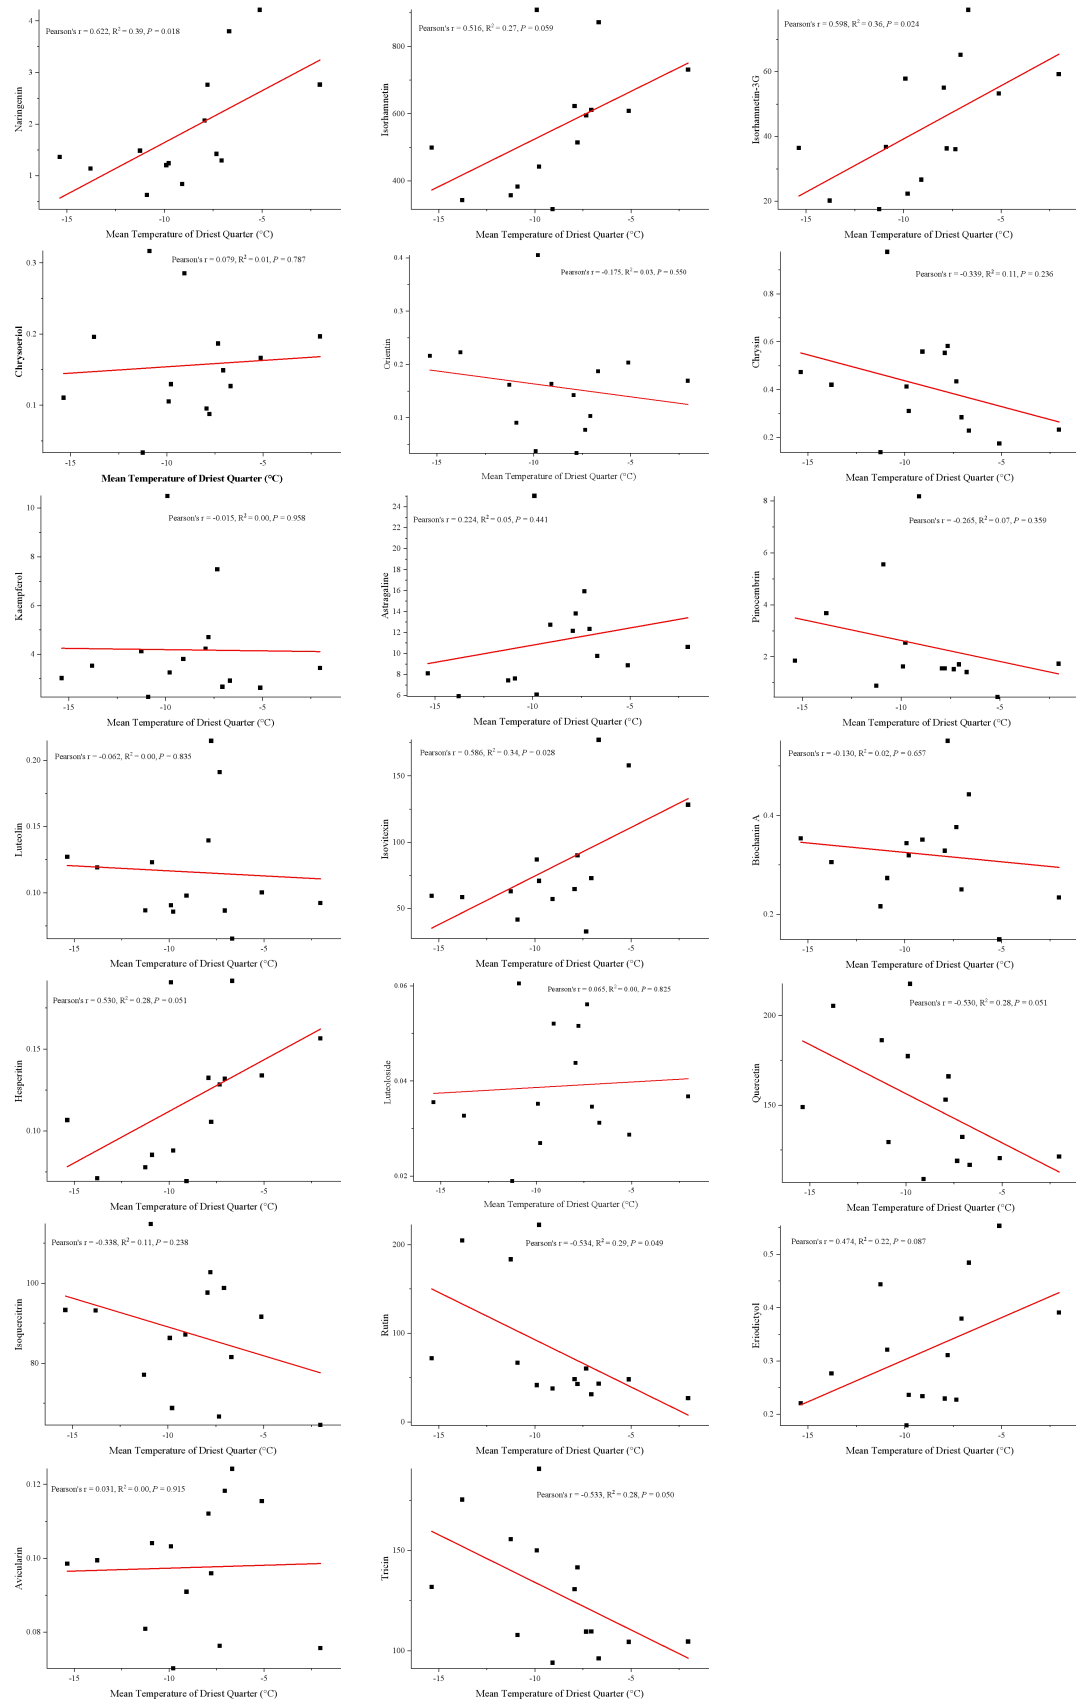

**Figure S10** Relationship between mean temperature of driest quarter and flavonoid metabolites. The linear regressions were considered significant when  $P < 0.05$ .

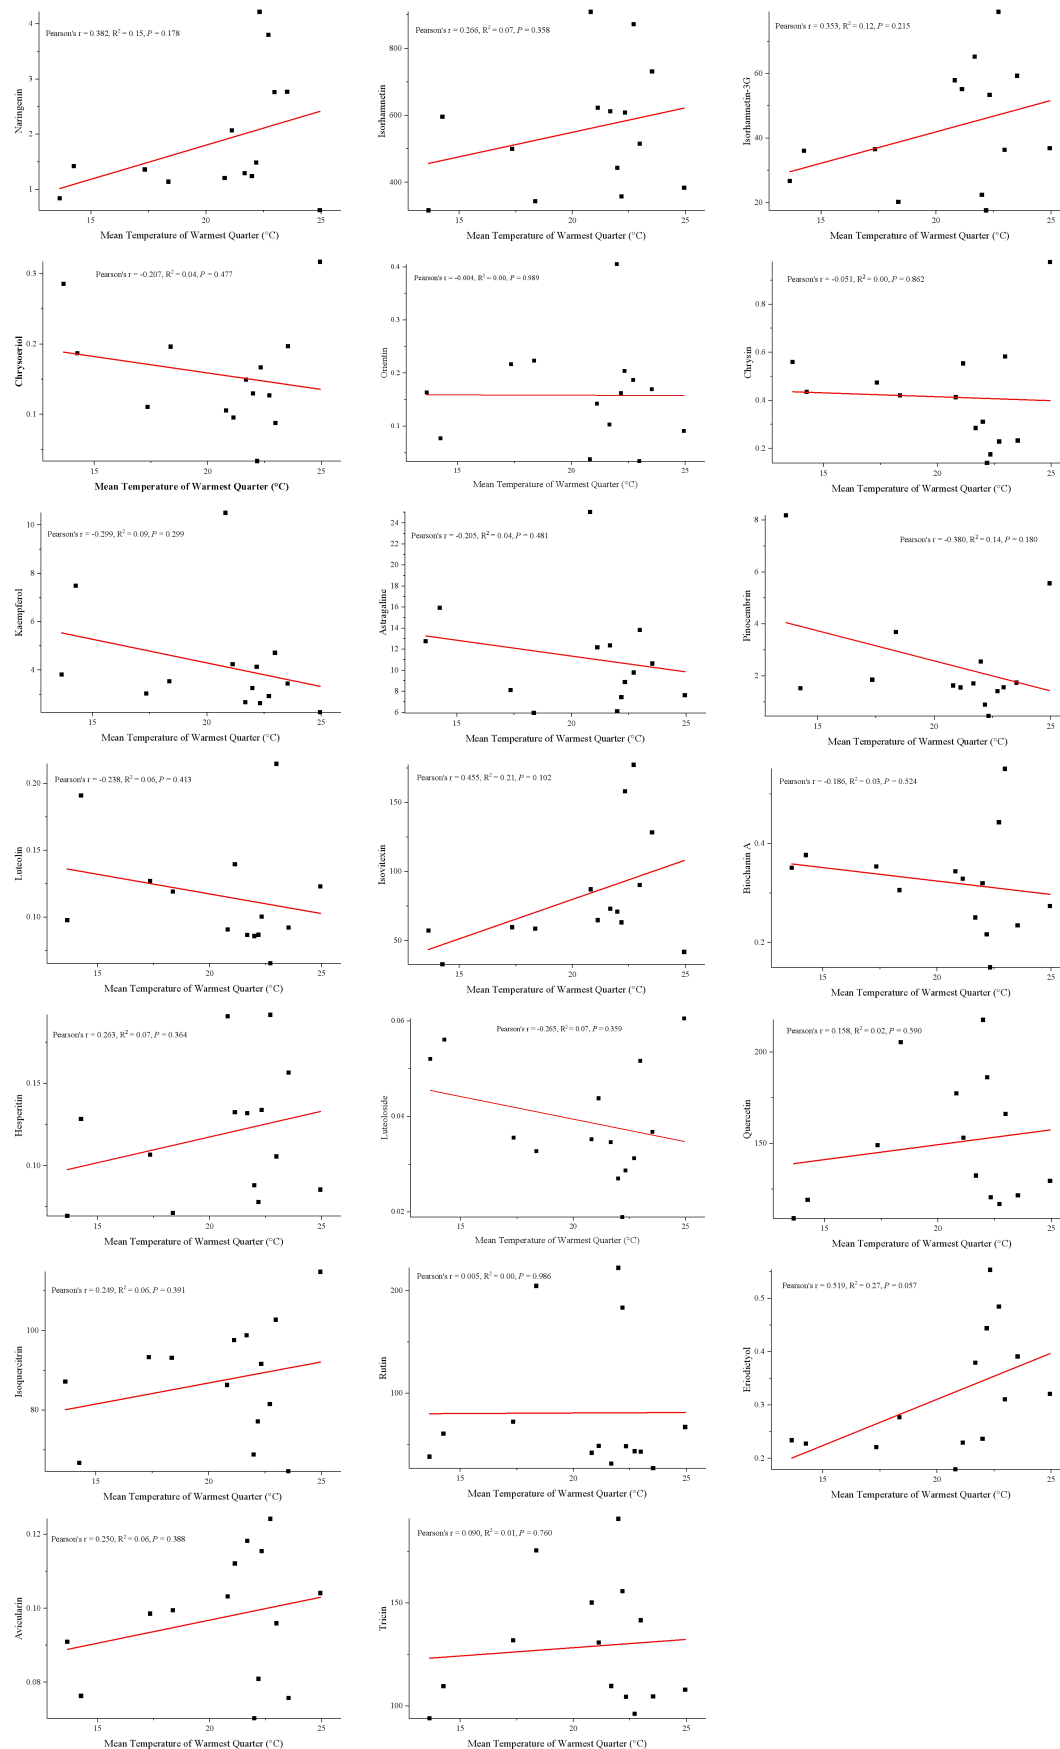

**Figure S11** Relationship between mean temperature of warmest quarter and flavonoid metabolites. The linear regressions were considered significant when  $P < 0.05$ .

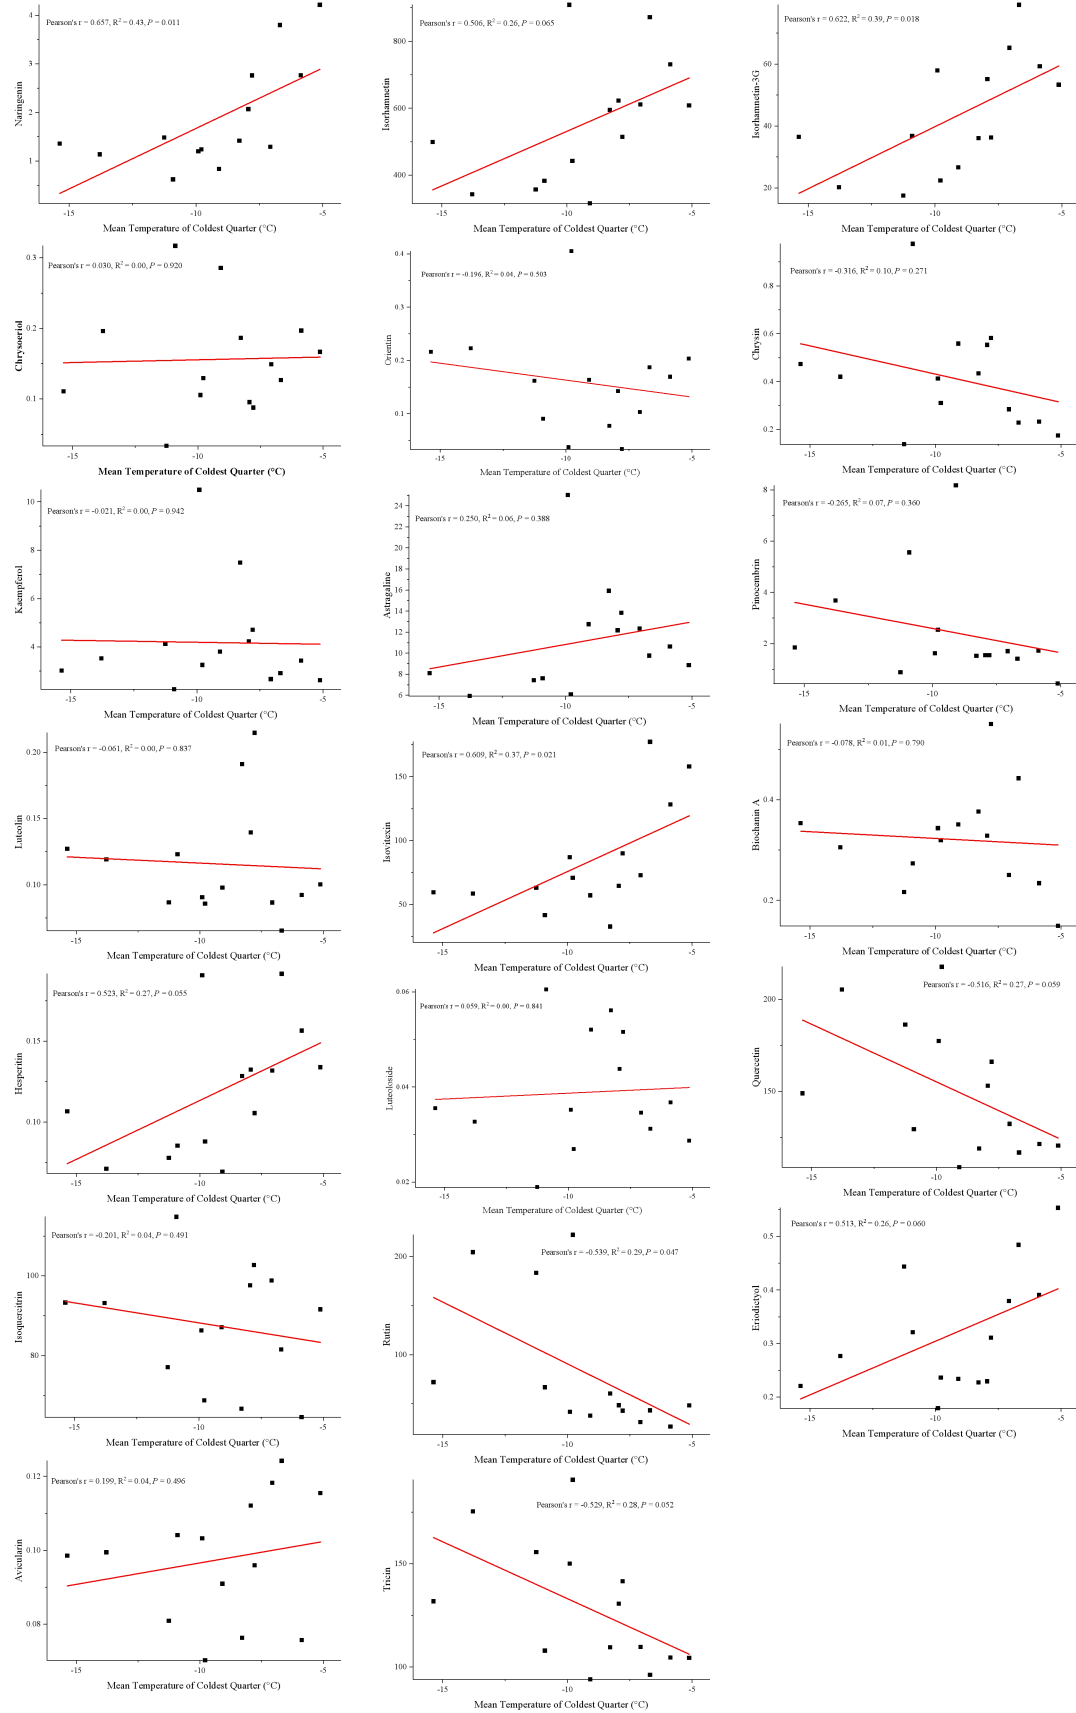

**Figure S12** Relationship between mean temperature of coldest quarter and flavonoid metabolites. The linear regressions were considered significant when  $P < 0.05$ .

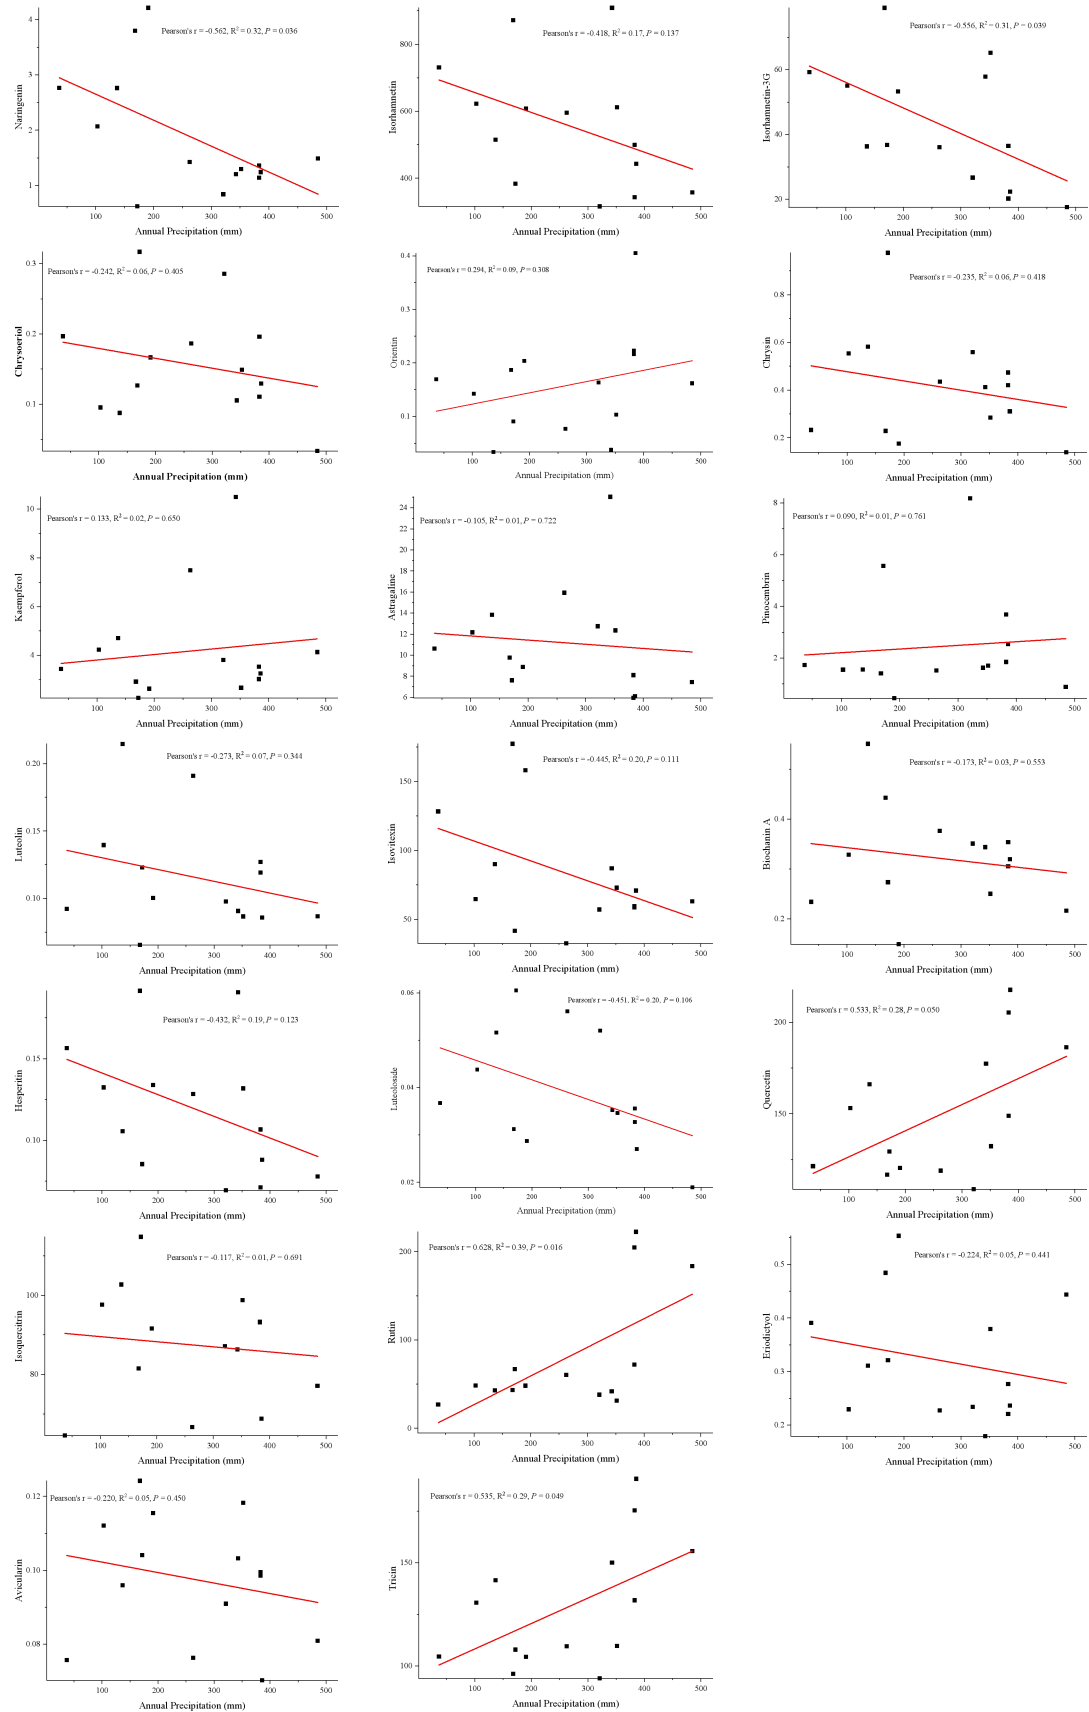

**Figure S13** Relationship between annual precipitation and flavonoid metabolites. The linear regressions were considered significant when  $P < 0.05$ .

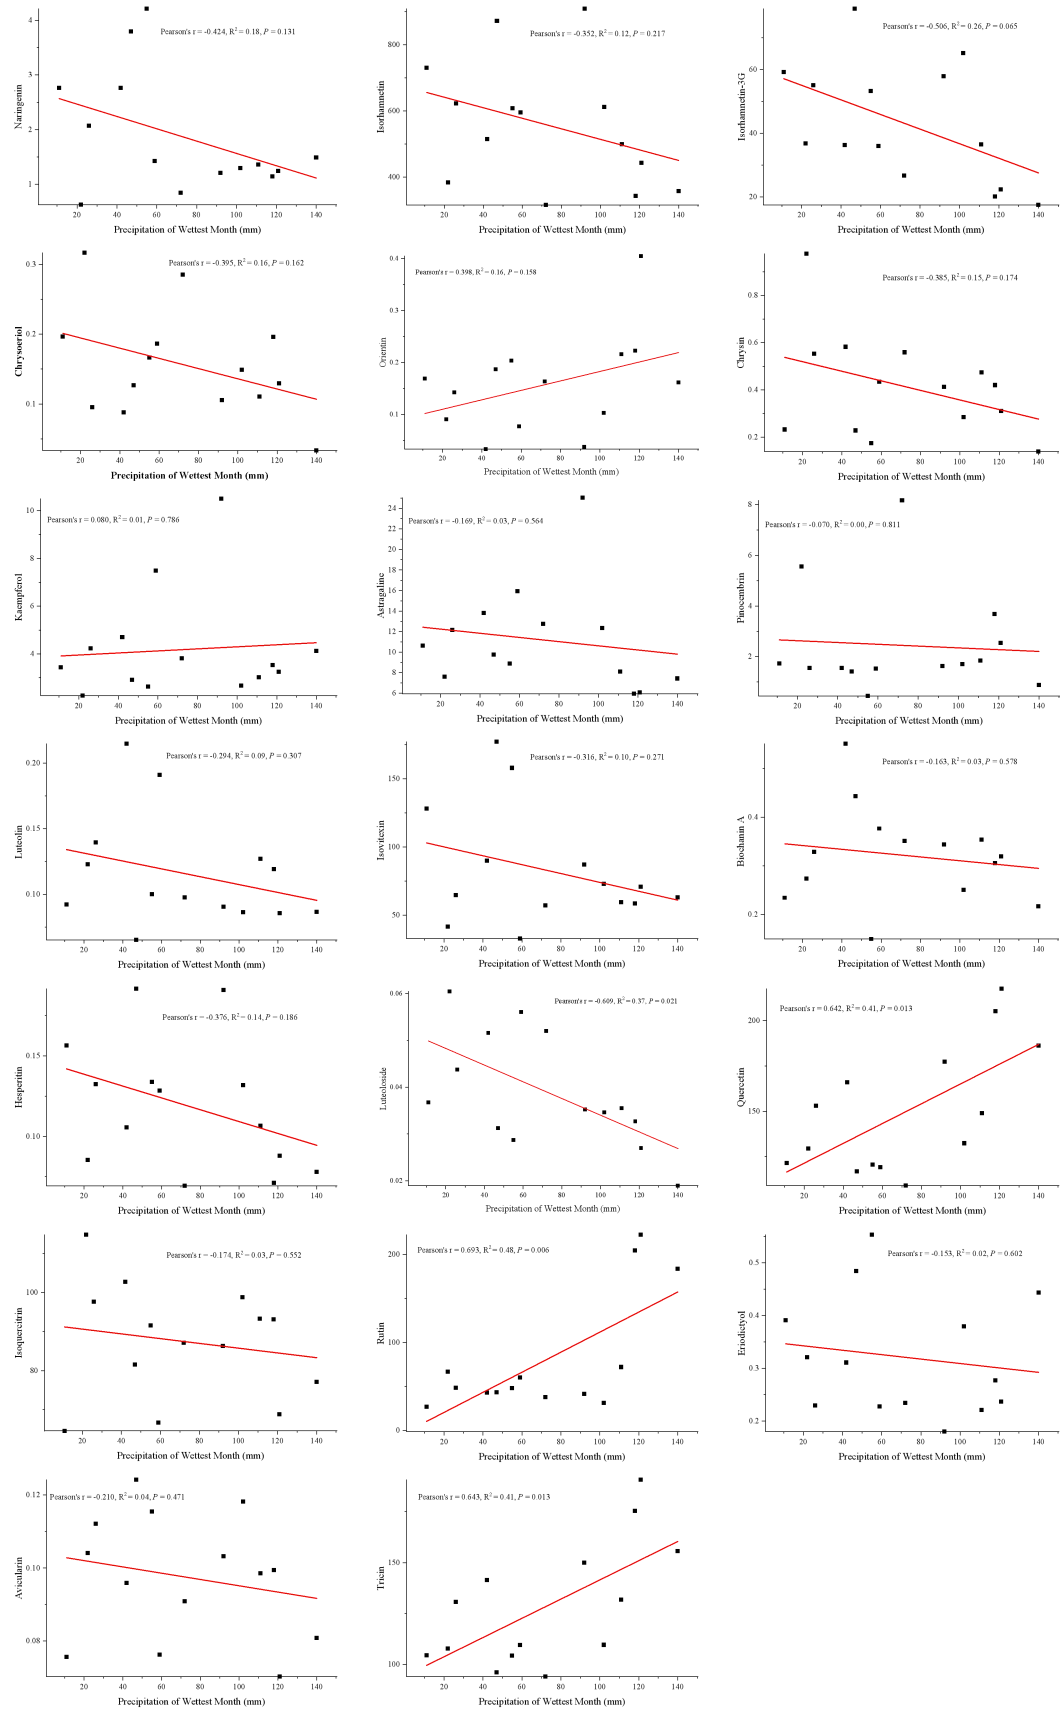

**Figure S14** Relationship between precipitation of wettest month and flavonoid metabolites. The linear regressions were considered significant when  $P < 0.05$ .

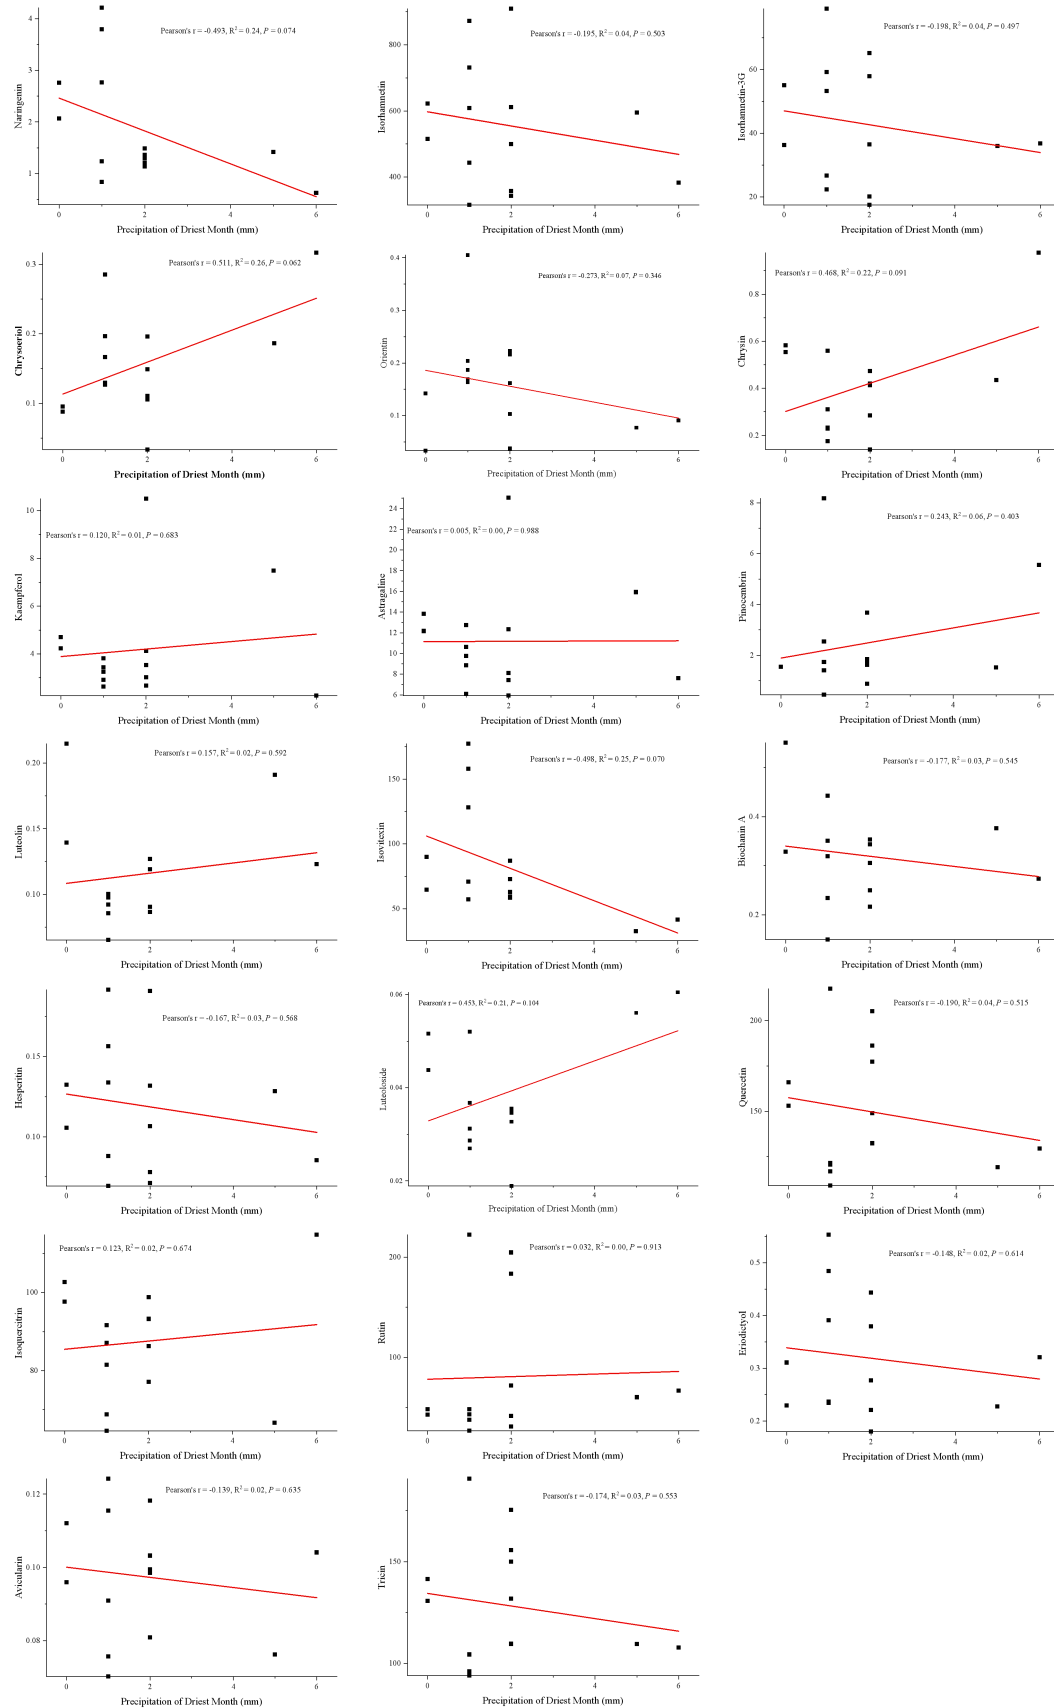

**Figure S15** Relationship between precipitation of driest month and flavonoid metabolites. The linear regressions were considered significant when  $P < 0.05$ .

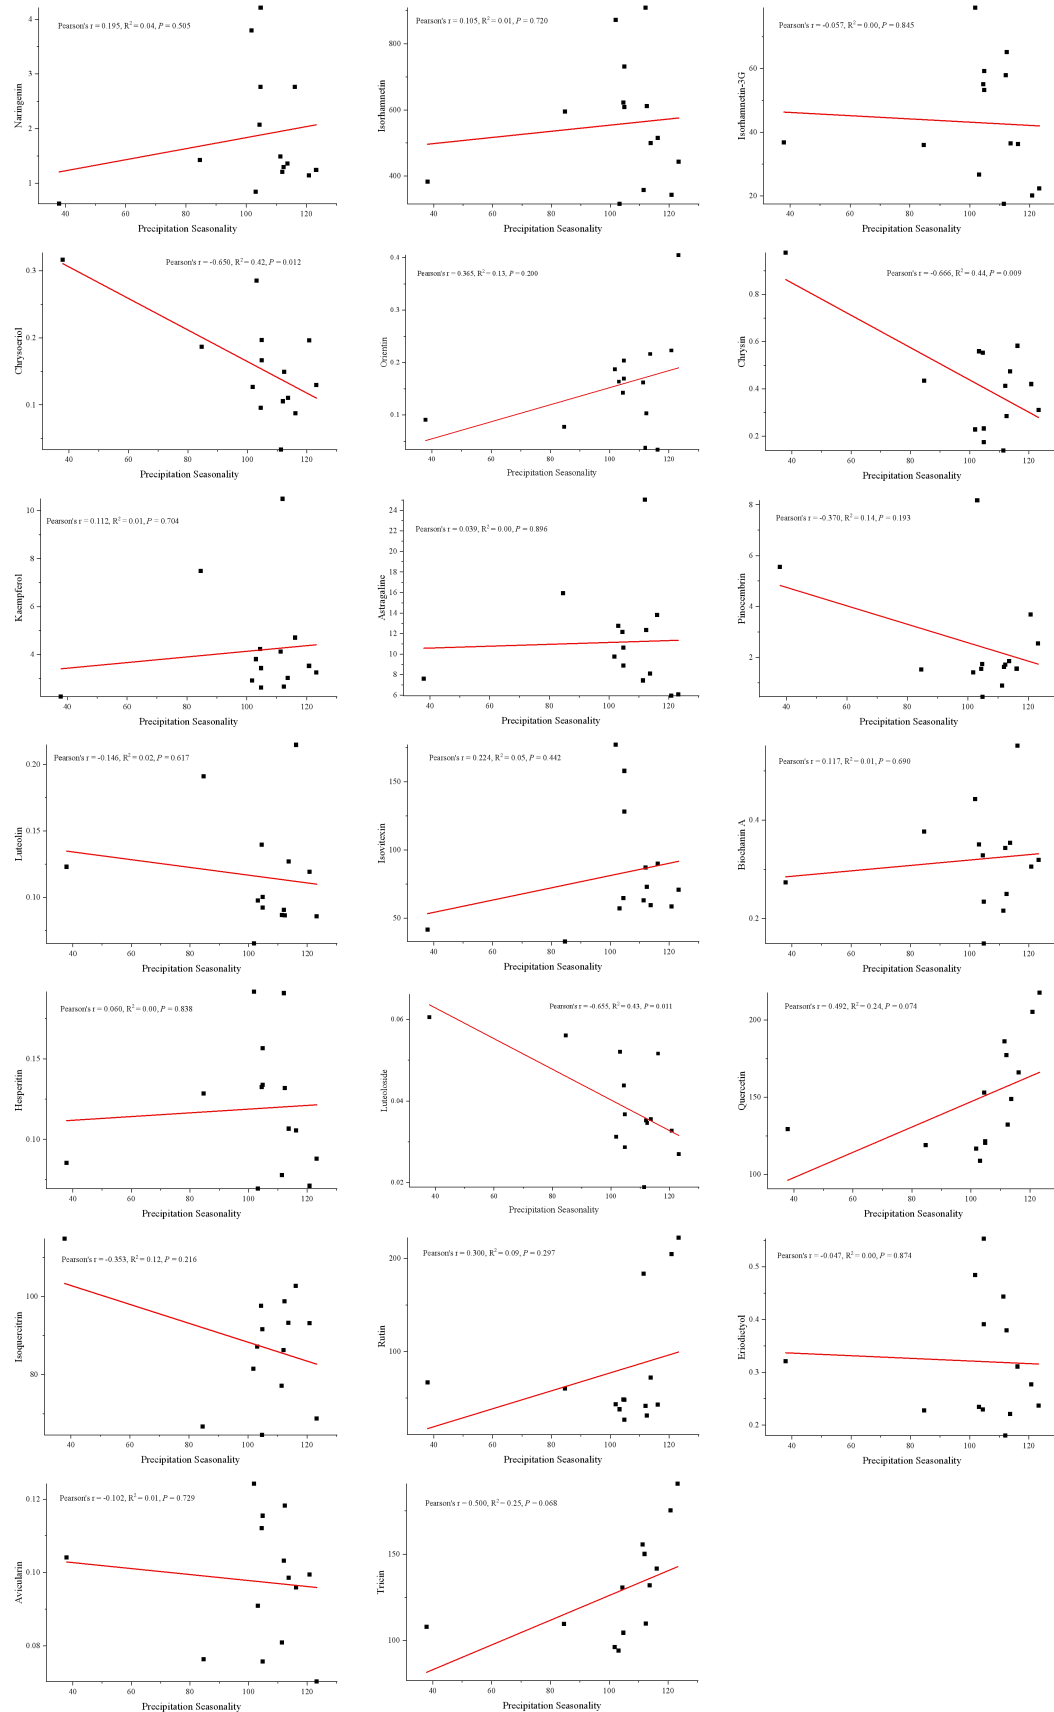

**Figure S16** Relationship between precipitation seasonality and flavonoid metabolites. The linear regressions were considered significant when  $P < 0.05$ .



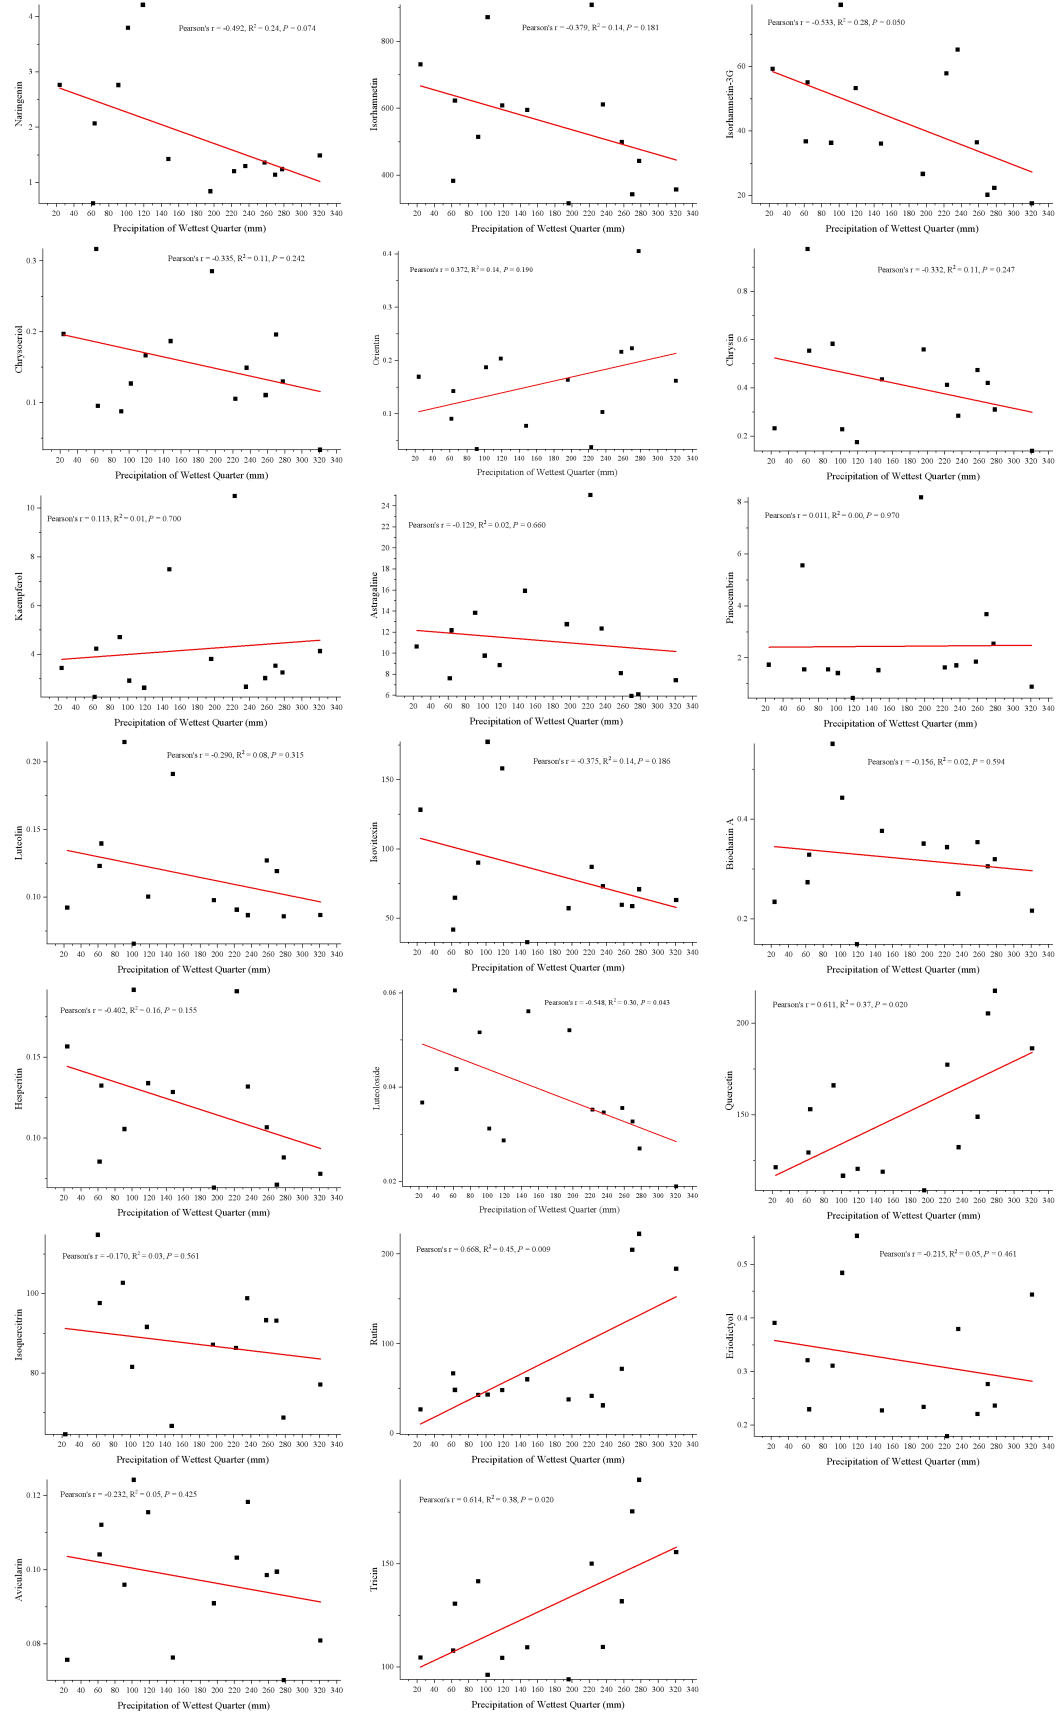

**Figure S17** Relationship between precipitation of wettest quarter and flavonoid metabolites. The linear regressions were considered significant when  $P < 0.05$ .

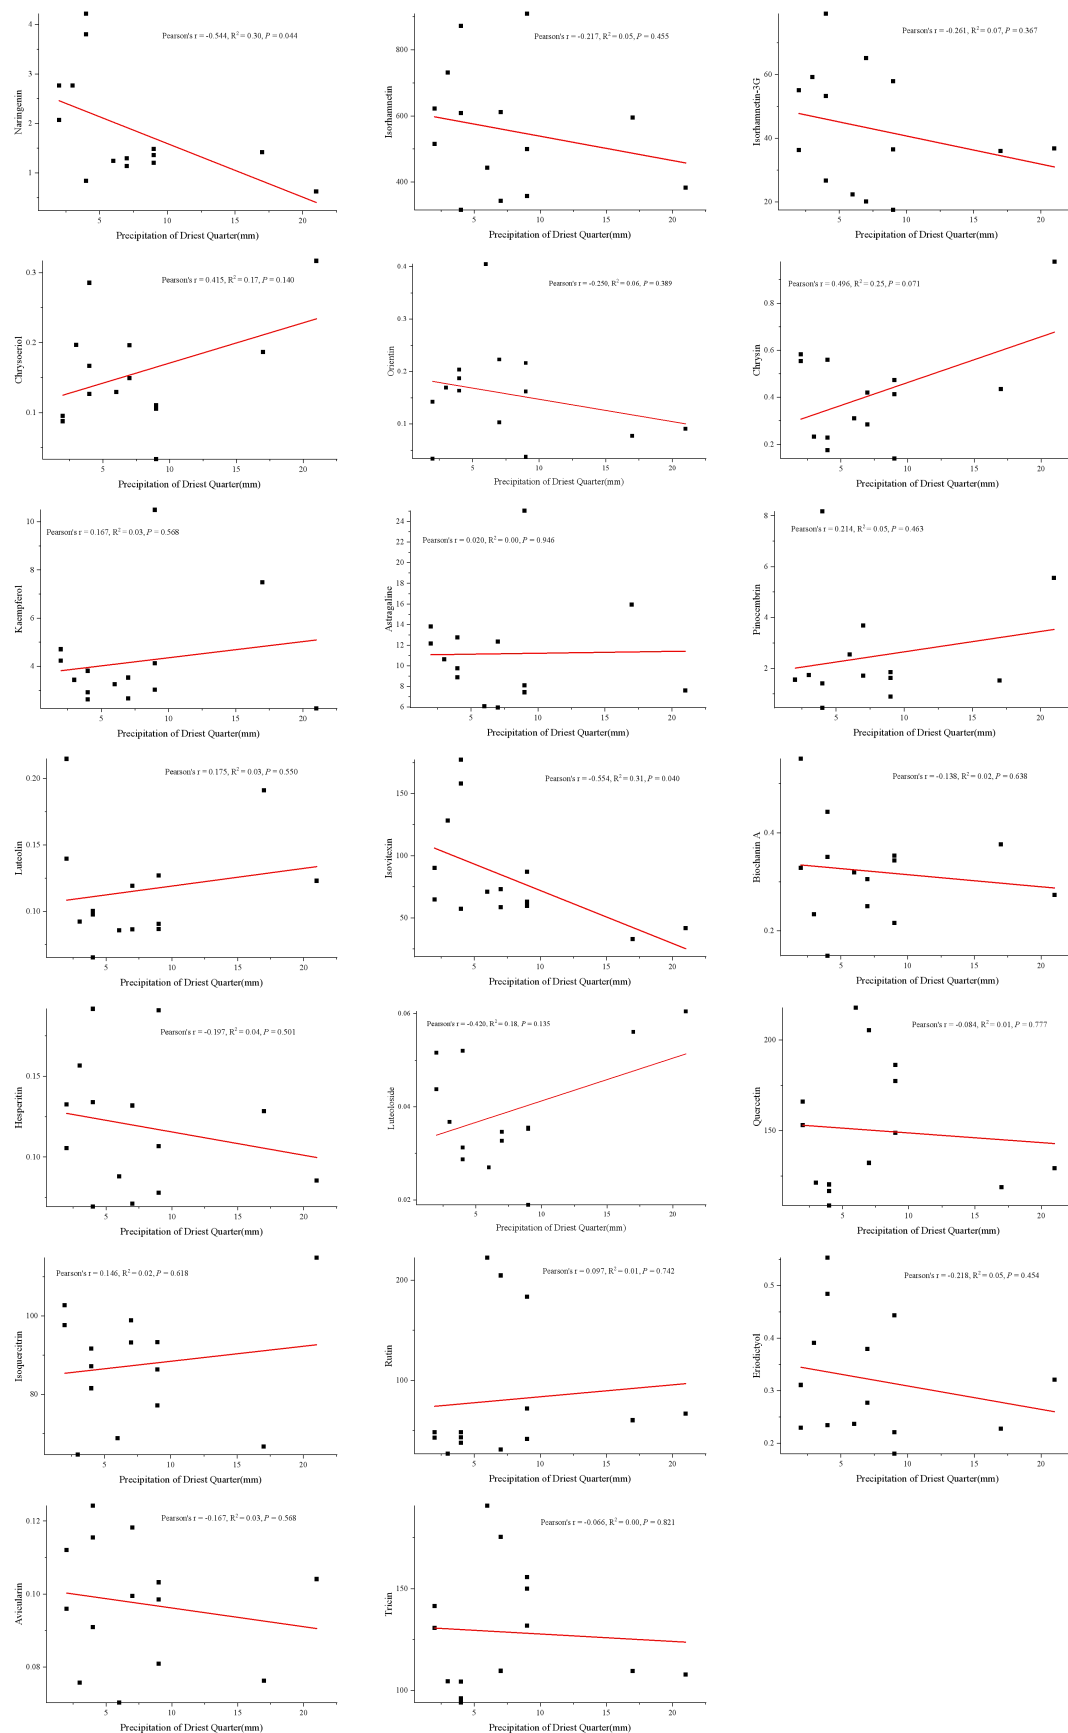

**Figure S18** Relationship between precipitation of driest quarter and flavonoid metabolites. The linear regressions were considered significant when  $P < 0.05$ .

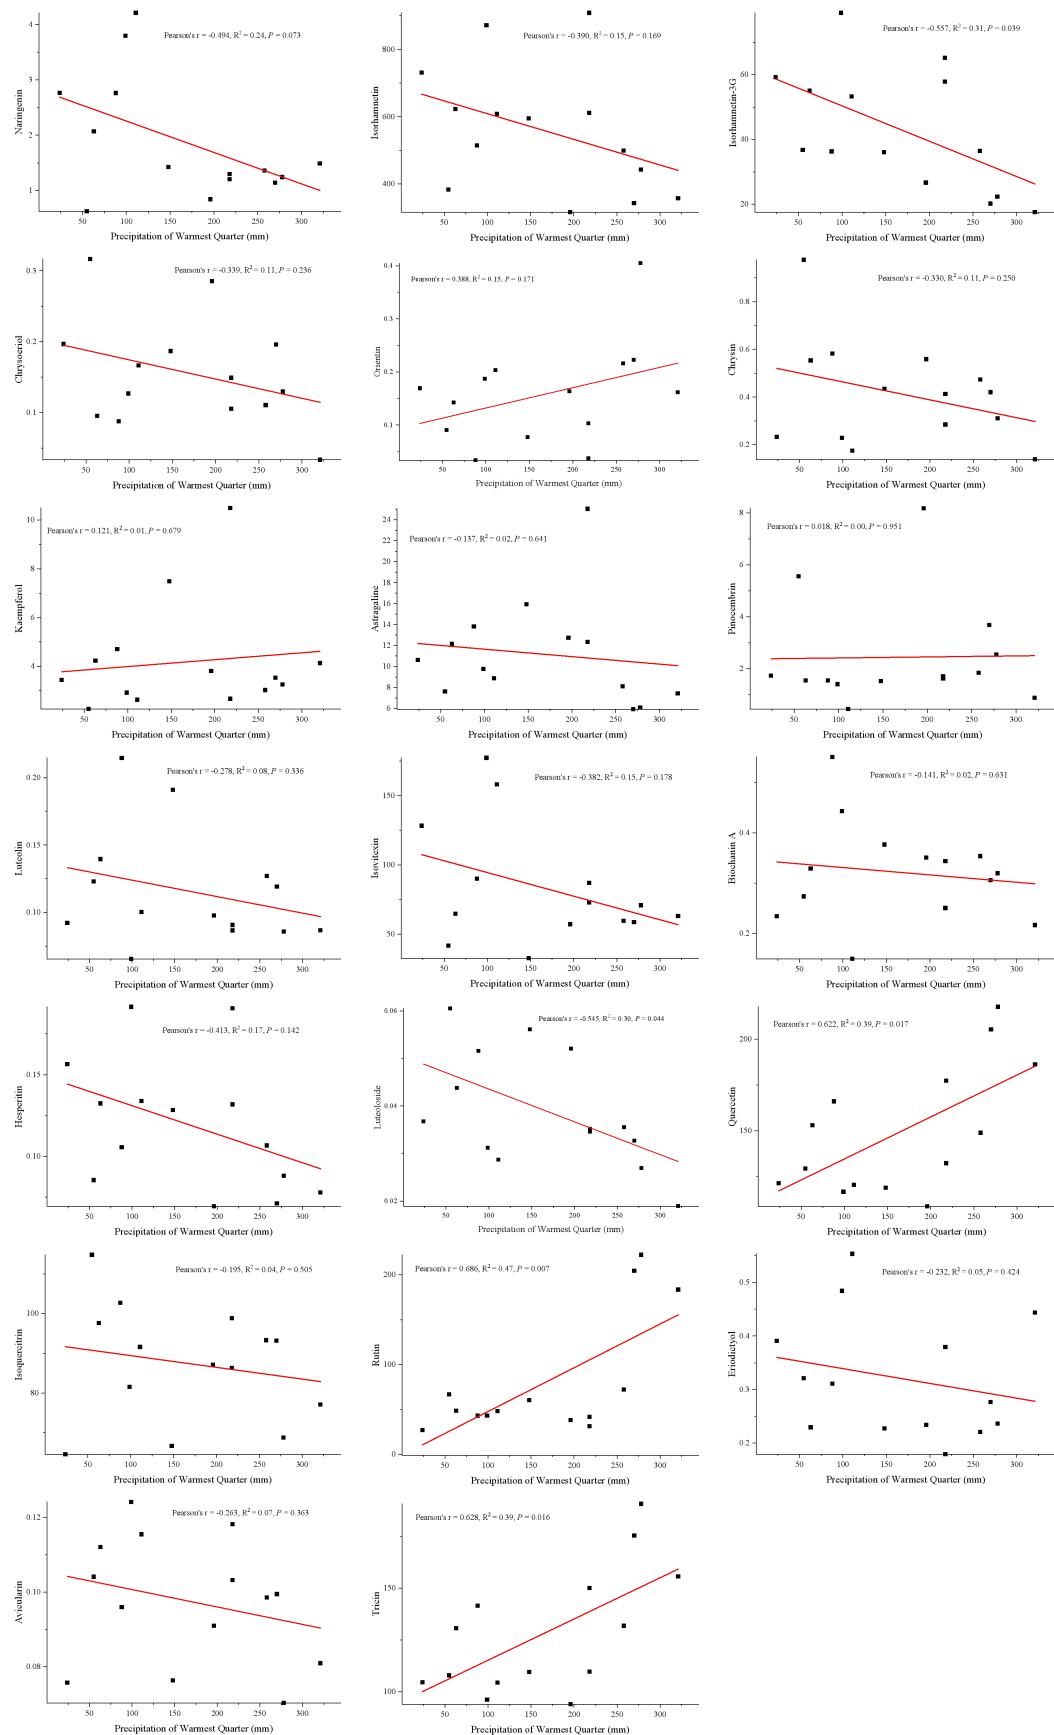

**Figure S19** Relationship between precipitation of warmest quarter and flavonoid metabolites. The linear regressions were considered significant when  $P < 0.05$ .

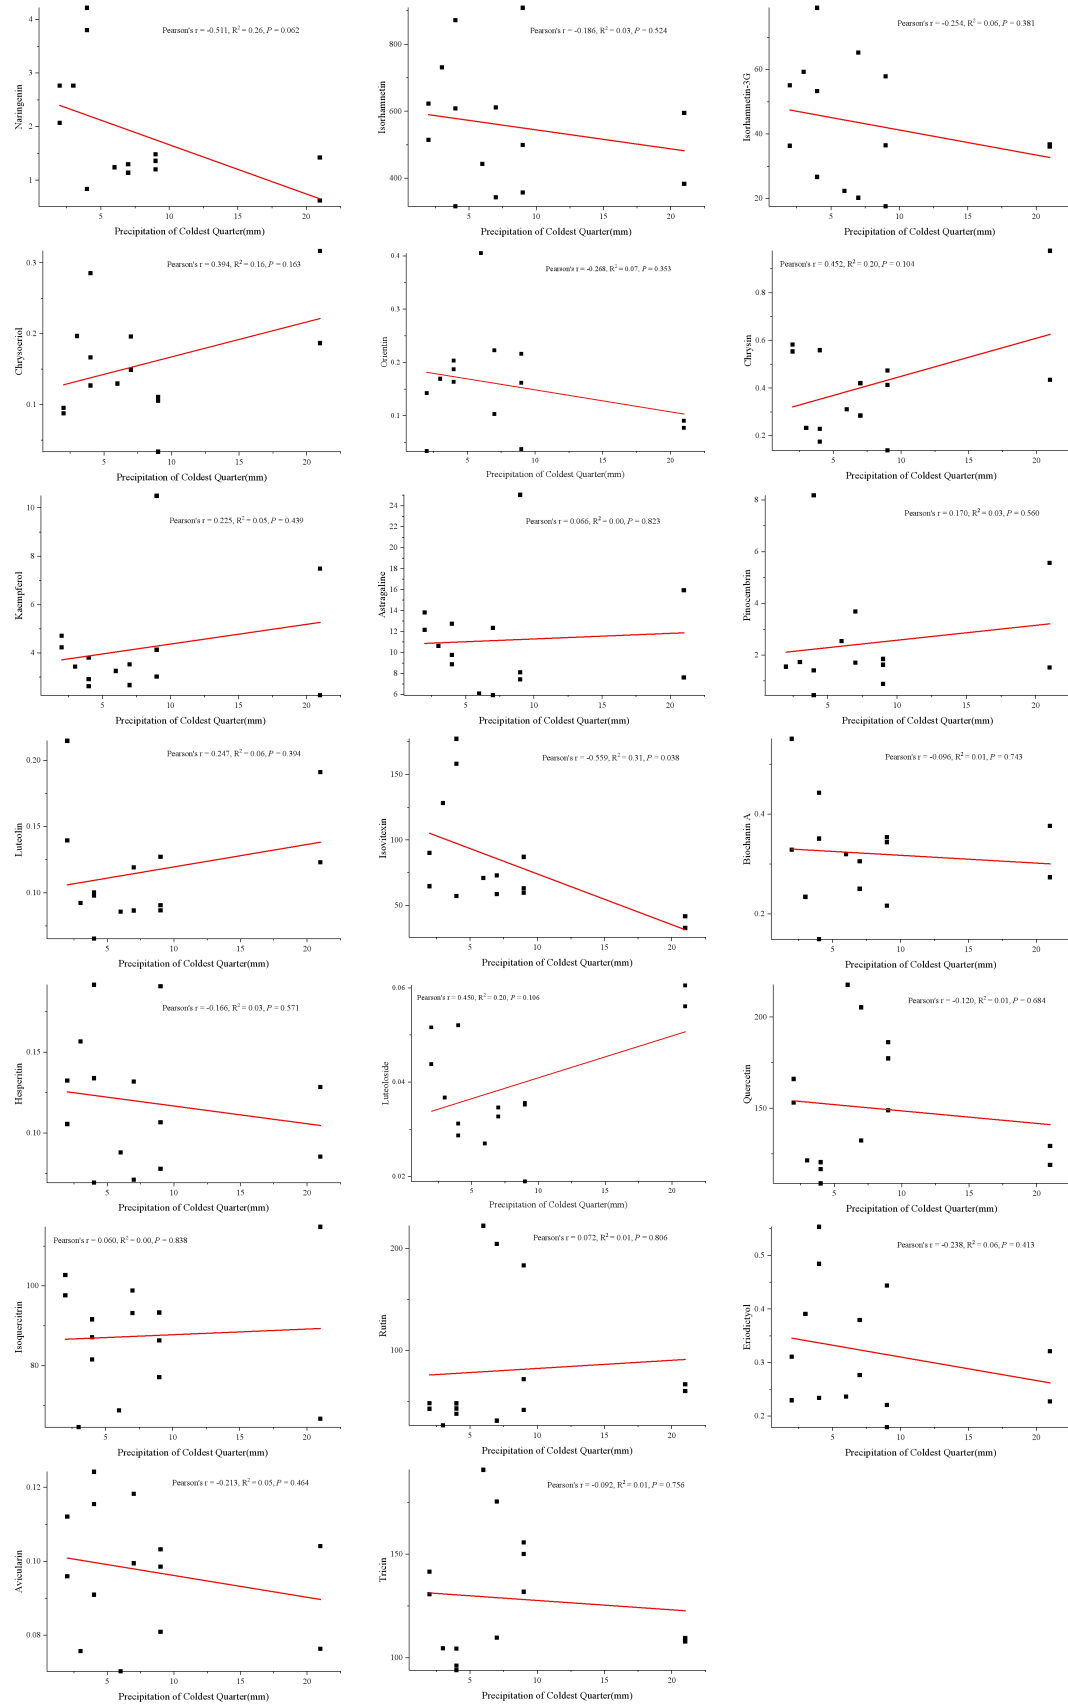

**Figure S20** Relationship between precipitation of coldest quarter and flavonoid metabolites. The linear regressions were considered significant when  $P < 0.05$ .

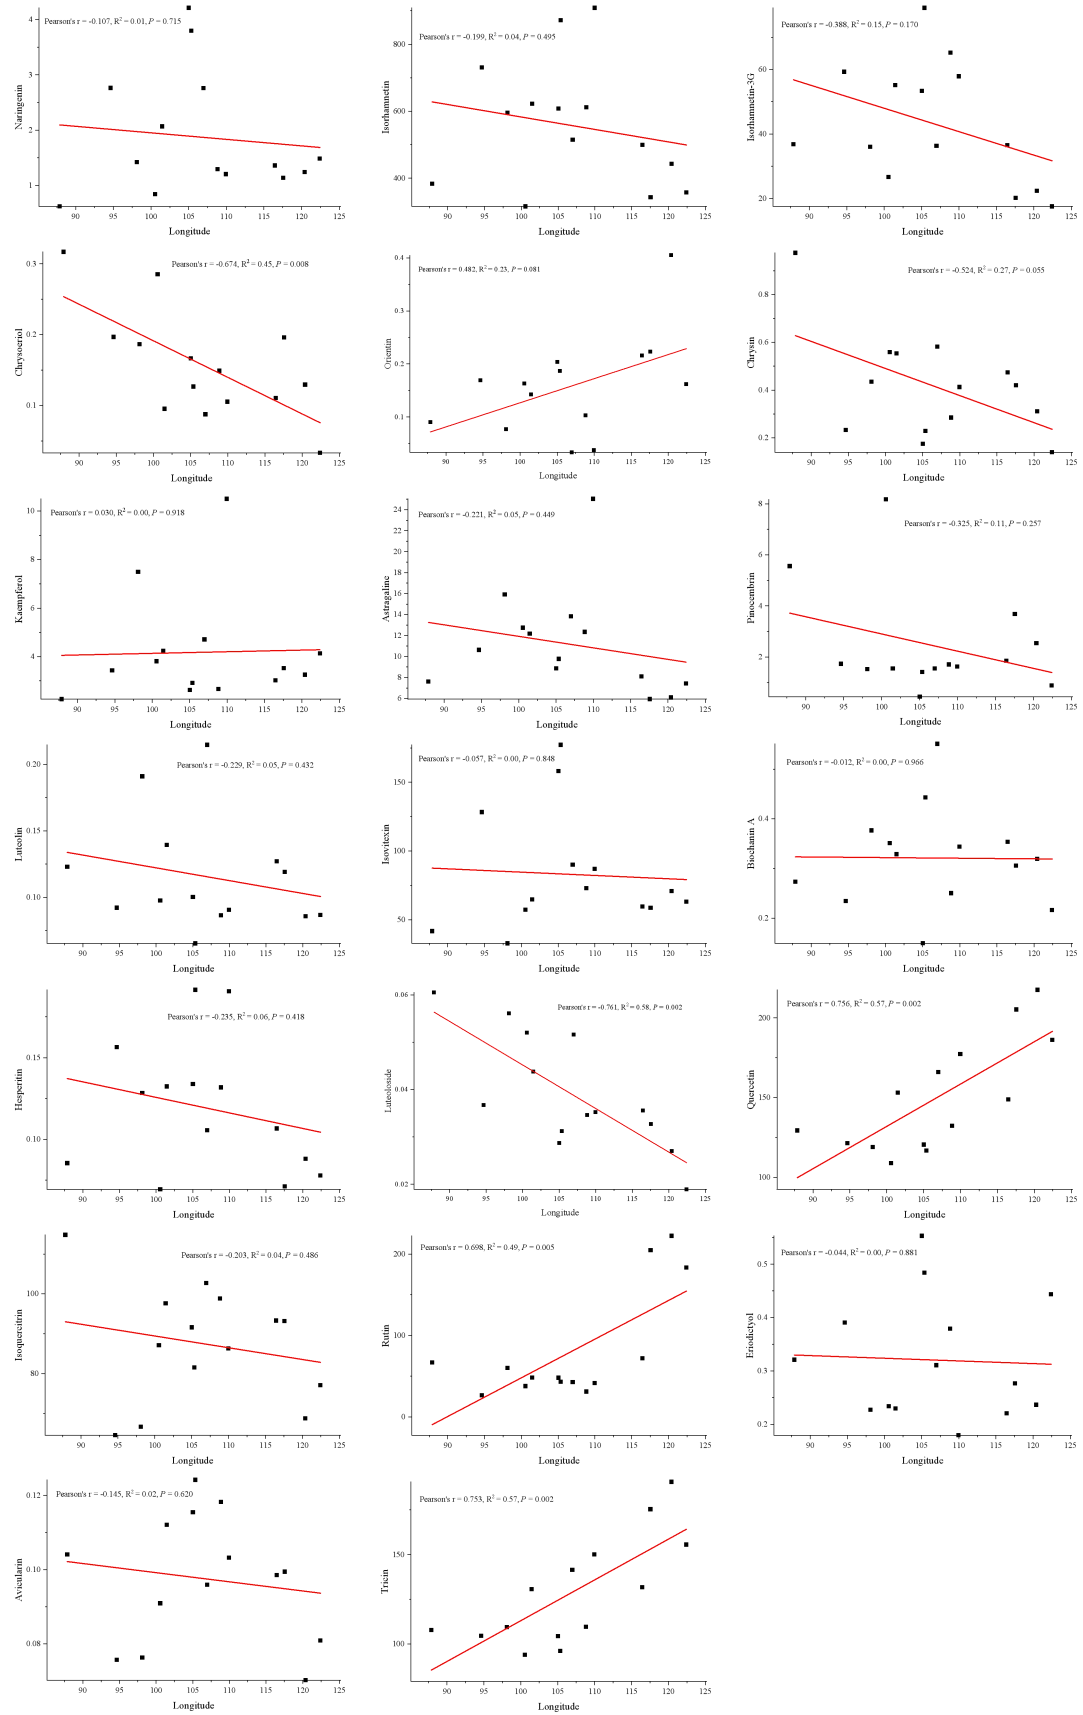

**Figure S21** Relationship between longitude and flavonoid metabolites. The linear regressions were considered significant when  $P < 0.05$ .

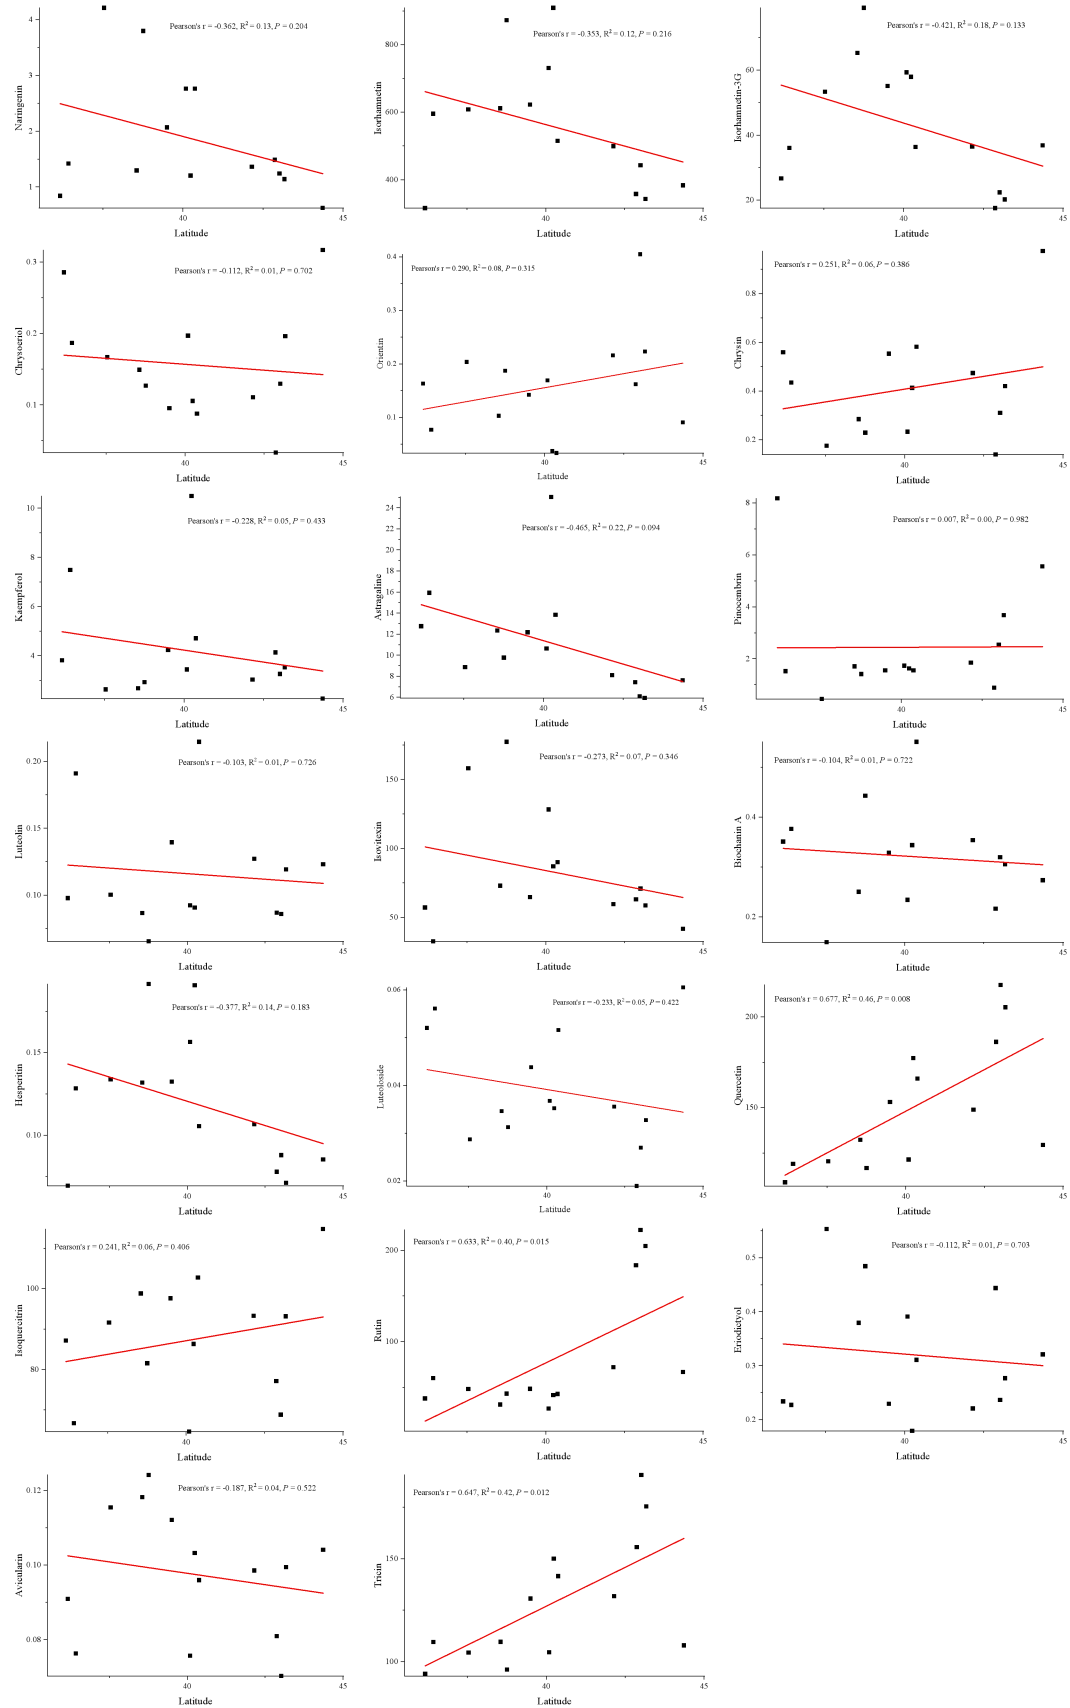

**Figure S22** Relationship between latitude and flavonoid metabolites. The linear regressions were considered significant when  $P < 0.05$ .
